# Supplementary material for: Data mining to understand health status preceding traumatic brain injury
Source: PubMed Central journal article supplement (PMC6447542; doi:10.1038/s41598-019-41916-5), 2019-04-03
Supplement: 41598_2019_41916_MOESM1_ESM.pdf [file 41598_2019_41916_MOESM1_ESM.pdf]

## **Online data supplement**

**Title:** Data mining to understand health status preceding traumatic brain injury.

**Authors:** Tatyana Mollayeva, Mitchell Sutton, Vincy Chan, Angela Colantonio, Sayantee Jana,  
Michael Escobar

### **Table of contents**

Supplementary Figure 1. A histogram of the number of visits to the hospital by the number of days between the visit and first TBI

Supplementary Figure 2. A boxplot of the number of visits to the hospital by the number of days between the visit and first TBI

Supplementary Figure 3. Scree plot of all factors

Supplementary Figure 4. Scree plot of the first 50 factors. Methods used to extract the optimal numbers of factors were Eigenvalues, the plateau of Eigenvalues (i.e. the 'elbow' in the scree plot), and the variance explained

Supplementary Table 1. Factor descriptions. Provides all ICD-10 codes included in each factor, including their descriptions, frequencies (in TBI and reference population), odds ratio (and 95% confidence interval) from multiple testing results, and factor loading score for each factor

Supplementary Table 2. ICD-10 Codes not included in the Factors. Provides all ICD-10 codes not included in any factor (in alphabetical order), including their descriptions, frequencies (in TBI and reference population), and odds ratio (and 95% confidence interval) from multiple testing results

Supplementary Table 3. Scree table. Provides eigenvalues and their differences used in preparation of scree plots, as well as the proportion/cumulative proportion of total variance explained by each factor; used to make a decision on the number of factors to include in the final model

Supplementary Figure 1. A histogram of the number of visits to the hospital by the number of days between the visit and first TBI.

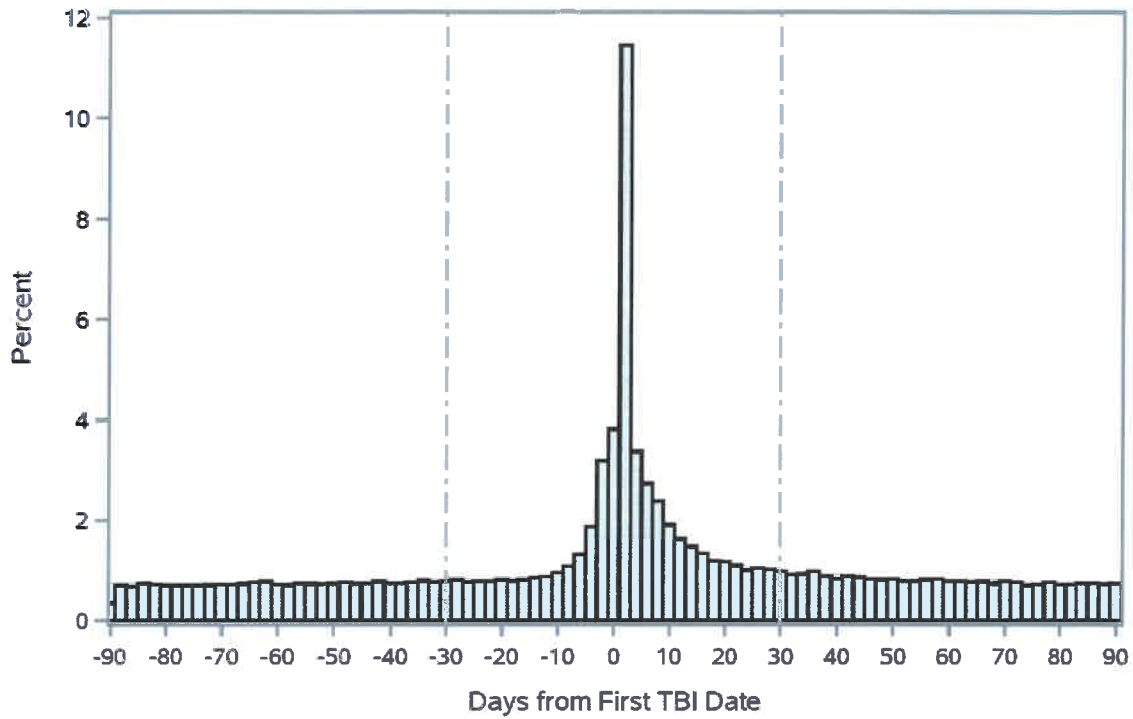

Supplementary Figure 2. A boxplot of the number of visits to the hospital by the number of days between the visit and first TBI.

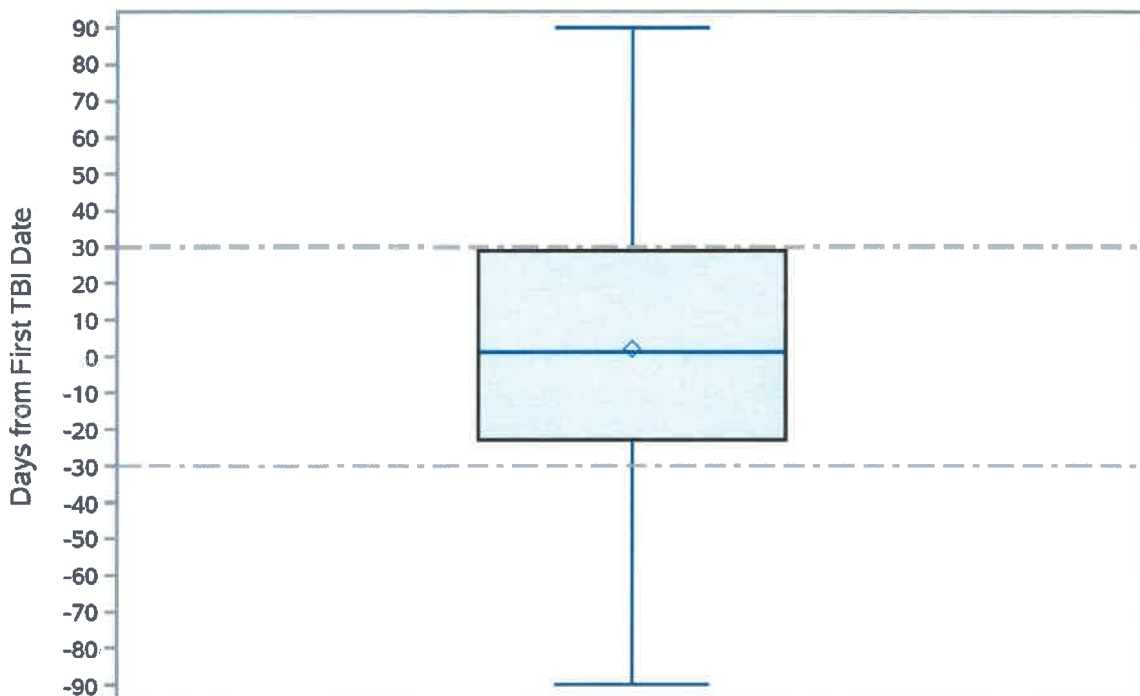

Supplementary Figure 3. Scree plot of all factors.

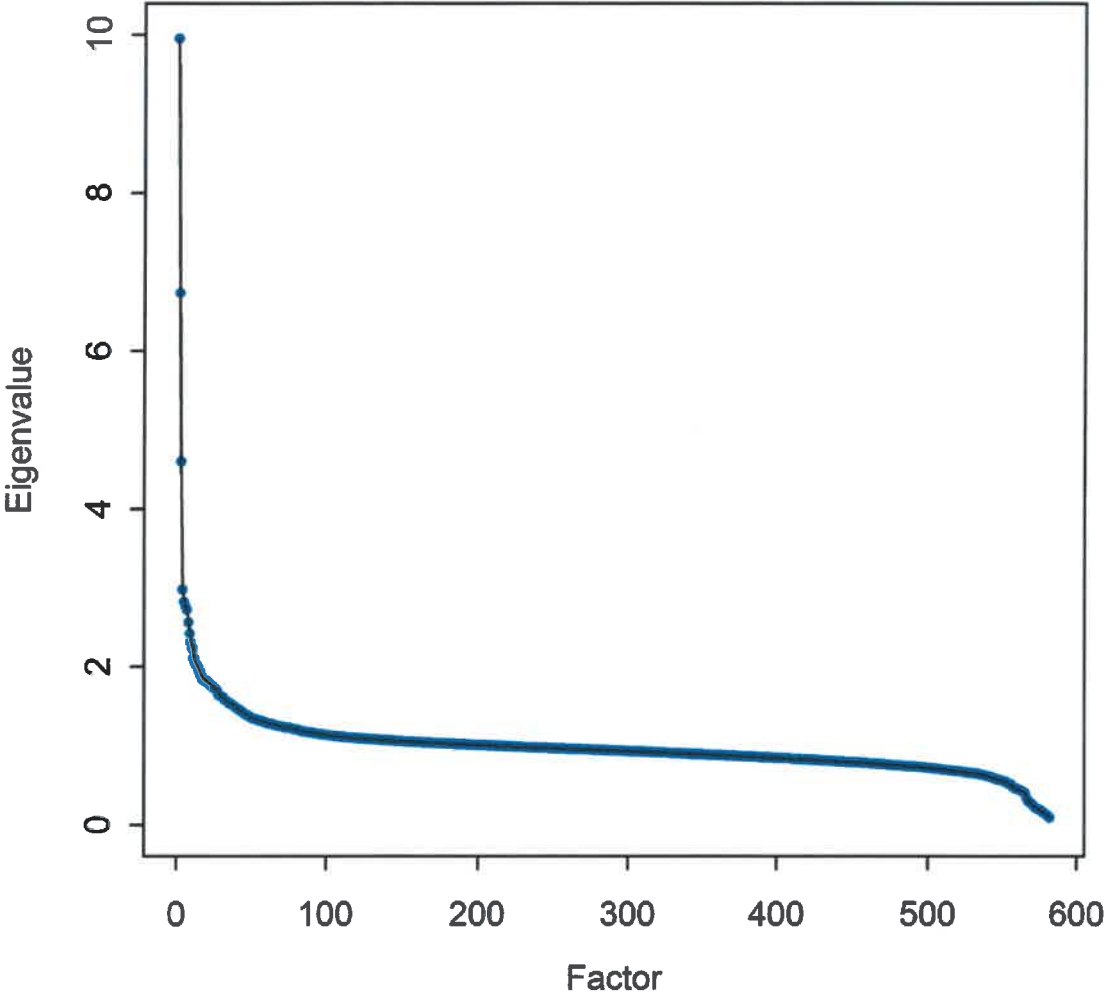

Supplementary Figure 4. Scree plot of the first 50 factors. Methods used to extract the optimal number of factors were Eigenvalues, the plateau of Eigenvalues (i.e. the 'elbow' in the scree plot), and the variance explained.

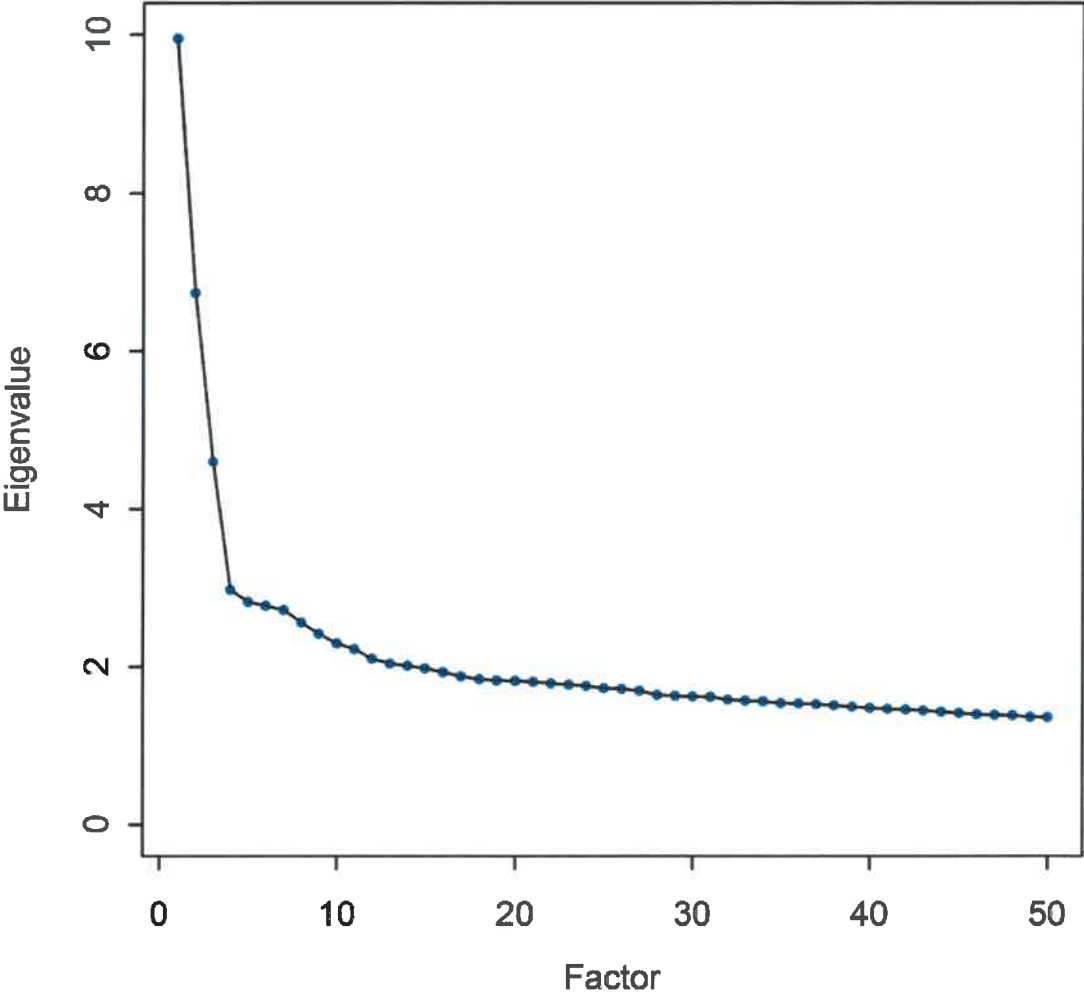

**Supplementary Table 1 - Factor Descriptions.** Provides all ICD-10 codes included in each factor, including their descriptions, frequencies (in TBI and reference population), odds ratio (and 95% confidence interval) from multiple testing results, and factor loading score for each factor.

| Factor Number                                            | Factors                                                                                                                                               | Frequency     |                      | Odds Ratio  | Confidence Interval | p-value           | Factor Loading |
|----------------------------------------------------------|-------------------------------------------------------------------------------------------------------------------------------------------------------|---------------|----------------------|-------------|---------------------|-------------------|----------------|
|                                                          |                                                                                                                                                       | TBI           | Reference Population |             |                     |                   |                |
| 1                                                        | <b>Cardiology: Cardiovascular Disorders and Other</b>                                                                                                 | <b>9,818</b>  | <b>5,434</b>         | <b>2.2</b>  | <b>(2.1, 2.3)</b>   | <b>&lt;0.0001</b> | <b>-</b>       |
|                                                          | I25 Chronic ischemic heart disease                                                                                                                    | 1,214         | 896                  | 1.4         | (1.3, 1.5)          |                   | 0.72           |
|                                                          | I21 ST elevation (STEMI) and non-ST elevation (NSTEMI) myocardial infarction                                                                          | 505           | 394                  | 1.3         | (1.1, 1.5)          |                   | 0.71           |
|                                                          | R94 Abnormal results of function studies                                                                                                              | 630           | 369                  | 1.7         | (1.5, 2)            |                   | 0.66           |
|                                                          | Z95 Presence of cardiac and vascular implants and grafts                                                                                              | 709           | 357                  | 2.0         | (1.8, 2.3)          |                   | 0.54           |
|                                                          | I20 Angina pectoris                                                                                                                                   | 664           | 441                  | 1.5         | (1.4, 1.7)          |                   | 0.51           |
|                                                          | E78 Disorders of lipoprotein metabolism and other lipidemias                                                                                          | 566           | 416                  | 1.4         | (1.2, 1.6)          |                   | 0.47           |
|                                                          | I24 Other acute ischemic heart diseases                                                                                                               | 383           | 189                  | 2.0         | (1.7, 2.4)          |                   | 0.45           |
|                                                          | I10 Essential (primary) hypertension                                                                                                                  | 2,972         | 1,915                | 1.7         | (1.6, 1.8)          |                   | 0.43           |
|                                                          | I50 Heart failure                                                                                                                                     | 1,024         | 473                  | 2.3         | (2, 2.5)            |                   | 0.36           |
|                                                          | I48 Atrial fibrillation and flutter                                                                                                                   | 1,393         | 682                  | 2.2         | (2, 2.5)            |                   | 0.31           |
|                                                          | I35 Nonrheumatic aortic valve disorders                                                                                                               | 152           | 74                   | 2.1         | (1.6, 2.7)          |                   | 0.24           |
|                                                          | R07 Pain in throat and chest                                                                                                                          | 5,419         | 2,502                | 2.3         | (2.2, 2.4)          |                   | 0.23           |
|                                                          | E11 Type 2 diabetes mellitus                                                                                                                          | 2,507         | 1,337                | 2.0         | (1.9, 2.2)          |                   | 0.23           |
| 2                                                        | <b>Psychiatry: Mental Disorders and Functional Inquiry</b>                                                                                            | <b>4,941</b>  | <b>1,828</b>         | <b>2.9</b>  | <b>(2.7, 3.1)</b>   | <b>&lt;0.0001</b> | <b>-</b>       |
|                                                          | R45 Symptoms and signs involving emotional state                                                                                                      | 1,264         | 353                  | 3.6         | (3.2, 4.1)          |                   | 0.50           |
|                                                          | F32 Major depressive disorder, single episode                                                                                                         | 1,626         | 554                  | 3.0         | (2.7, 3.3)          |                   | 0.48           |
|                                                          | F43 Reaction to severe stress, and adjustment disorders                                                                                               | 1,168         | 309                  | 3.9         | (3.4, 4.4)          |                   | 0.48           |
|                                                          | F60 Specific personality disorders                                                                                                                    | 270           | 80                   | 3.4         | (2.6, 4.4)          |                   | 0.45           |
|                                                          | Z63 Other problems related to primary support group, including family circumstances                                                                   | 295           | 105                  | 2.8         | (2.2, 3.5)          |                   | 0.44           |
|                                                          | F91 Conduct disorders                                                                                                                                 | 131           | 85                   | 1.5         | (1.2, 2)            |                   | 0.35           |
|                                                          | Z91 Personal risk factors, not elsewhere classified                                                                                                   | 374           | 108                  | 3.5         | (2.8, 4.3)          |                   | 0.33           |
|                                                          | X78 Intentional self-harm by sharp object                                                                                                             | 167           | 39                   | 4.3         | (3, 6.1)            |                   | 0.32           |
|                                                          | F31 Bipolar disorder                                                                                                                                  | 271           | 90                   | 3.0         | (2.4, 3.8)          |                   | 0.32           |
|                                                          | F41 Other anxiety disorders                                                                                                                           | 1,986         | 739                  | 2.8         | (2.6, 3)            |                   | 0.31           |
|                                                          | F33 Major depressive disorder, recurrent                                                                                                              | 88            | 42                   | 2.1         | (1.5, 3)            |                   | 0.30           |
|                                                          | F34 Persistent mood [affective] disorders                                                                                                             | 63            | 37                   | 1.7         | (1.1, 2.6)          |                   | 0.30           |
|                                                          | F90 Attention-deficit hyperactivity disorders                                                                                                         | 103           | 49                   | 2.1         | (1.5, 3)            |                   | 0.30           |
|                                                          | X61 Intentional self-poisoning by and exposure to antiepileptic, sedative-hypnotic, antiparkinsonism and psychotropic drugs, not elsewhere classified | 294           | 72                   | 4.1         | (3.2, 5.3)          |                   | 0.28           |
|                                                          | F61 Mixed and other personality disorders                                                                                                             | 41            | 7                    | 5.9         | (2.6, 13.1)         |                   | 0.27           |
|                                                          | X69 Intentional self-poisoning by and exposure to other and unspecified chemicals and noxious substances                                              | 29            | 8                    | 3.6         | (1.7, 7.9)          |                   | 0.26           |
|                                                          | F39 Unspecified mood [affective] disorder                                                                                                             | 81            | 21                   | 3.9         | (2.4, 6.2)          |                   | 0.26           |
|                                                          | Z59 Problems related to housing and economic circumstances                                                                                            | 158           | 26                   | 6.1         | (4, 9.2)            |                   | 0.25           |
|                                                          | F69 Unspecified disorder of adult personality and behaviour                                                                                           | NR            | <6                   | 10.8        | (4.3, 27)           |                   | 0.24           |
|                                                          | X60 Intentional self-poisoning by and exposure to nonopioid analgesics, antipyretics and antirheumatics                                               | 190           | 48                   | 4.0         | (2.9, 5.4)          |                   | 0.24           |
|                                                          | F19 Other psychoactive substance related disorders                                                                                                    | 526           | 110                  | 4.9         | (4, 6)              |                   | 0.23           |
|                                                          | Z60 Problems related to social environment                                                                                                            | 163           | 57                   | 2.9         | (2.1, 3.9)          |                   | 0.23           |
|                                                          | T43 Poisoning by, adverse effect of and underdosing of psychotropic drugs, not elsewhere classified                                                   | 269           | 61                   | 4.4         | (3.3, 5.8)          |                   | 0.23           |
| F12 Cannabis related disorders                           | 157                                                                                                                                                   | 56            | 2.8                  | (2.1, 3.9)  |                     | 0.23              |                |
| Z56 Problems related to employment and unemployment      | 70                                                                                                                                                    | 12            | 5.8                  | (3.2, 10.8) |                     | 0.21              |                |
| Z65 Problems related to other psychosocial circumstances | 69                                                                                                                                                    | 23            | 3.0                  | (1.9, 4.8)  |                     | 0.20              |                |
| T65 Toxic effect of other and unspecified substances     | 55                                                                                                                                                    | 22            | 2.5                  | (1.5, 4.1)  |                     | 0.20              |                |
| 3                                                        | <b>Geriatrics: Disorders of Elderly and Medical Issues</b>                                                                                            | <b>14,071</b> | <b>6,446</b>         | <b>2.8</b>  | <b>(2.7, 2.9)</b>   | <b>&lt;0.0001</b> | <b>-</b>       |
|                                                          | Z75 Problems related to medical facilities and other health care                                                                                      | 824           | 363                  | 2.4         | (2.1, 2.7)          |                   | 0.43           |
|                                                          | R29 Other symptoms and signs involving the nervous and musculoskeletal systems                                                                        | 459           | 71                   | 7.0         | (5.4, 9)            |                   | 0.41           |
|                                                          | S72 Fracture of femur                                                                                                                                 | 429           | 167                  | 2.6         | (2.2, 3.2)          |                   | 0.41           |
|                                                          | F03 Unspecified dementia                                                                                                                              | 422           | 112                  | 4.0         | (3.2, 4.9)          |                   | 0.36           |
|                                                          | R64 Cachexia                                                                                                                                          | 212           | 57                   | 3.8         | (2.8, 5.1)          |                   | 0.33           |
|                                                          | G20 Parkinson disease                                                                                                                                 | 124           | 31                   | 4.0         | (2.7, 5.9)          |                   | 0.32           |
|                                                          | F05 Delirium, not induced by alcohol and other psychoactive substances                                                                                | 455           | 102                  | 4.6         | (3.7, 5.8)          |                   | 0.32           |

|   |                                                                                                                |               |              |            |                   |                   |          |
|---|----------------------------------------------------------------------------------------------------------------|---------------|--------------|------------|-------------------|-------------------|----------|
|   | R41 Other symptoms and signs involving cognitive functions and awareness                                       | 823           | 236          | 3.6        | (3.1, 4.2)        |                   | 0.30     |
|   | W19 Unspecified fall                                                                                           | 3,376         | 848          | 4.2        | (3.9, 4.5)        |                   | 0.29     |
|   | W05 Fall from non-moving wheelchair, nonmotorized scooter and motorized mobility scooter                       | 180           | 30           | 6.0        | (4.1, 8.8)        |                   | 0.28     |
|   | W01 Fall on same level from slipping, tripping and stumbling                                                   | 4,015         | 1,139        | 3.8        | (3.6, 4.1)        |                   | 0.27     |
|   | R26 Abnormalities of gait and mobility                                                                         | 228           | 60           | 3.8        | (2.9, 5)          |                   | 0.26     |
|   | W18 Other slipping, tripping and stumbling and falls                                                           | 2,258         | 500          | 4.7        | (4.3, 5.2)        |                   | 0.26     |
|   | F02 Dementia in other diseases classified elsewhere                                                            | NR            | <6           | 8.0        | (2.4, 26.6)       |                   | 0.26     |
|   | M81 Osteoporosis without current pathological fracture                                                         | 131           | 79           | 1.7        | (1.3, 2.2)        |                   | 0.25     |
|   | Z50 Care involving use of rehabilitation procedures                                                            | 240           | 105          | 2.3        | (1.8, 2.9)        |                   | 0.24     |
|   | I10 Essential (primary) hypertension                                                                           | 2,972         | 1,915        | 1.7        | (1.6, 1.8)        |                   | 0.23     |
|   | N39 Other disorders of urinary system                                                                          | 3,480         | 1,965        | 1.9        | (1.8, 2)          |                   | 0.23     |
|   | Z74 Problems related to care provider dependency                                                               | 109           | 30           | 3.6        | (2.4, 5.4)        |                   | 0.22     |
|   | W06 Fall from bed                                                                                              | 390           | 60           | 6.6        | (5, 8.7)          |                   | 0.22     |
|   | E87 Other disorders of fluid, electrolyte and acid-base balance                                                | 996           | 421          | 2.5        | (2.2, 2.8)        |                   | 0.21     |
|   | Z73 Problems related to life management difficulty                                                             | 293           | 74           | 4.0        | (3.1, 5.2)        |                   | 0.21     |
|   | R53 Malaise and fatigue                                                                                        | 1,406         | 627          | 2.3        | (2.1, 2.6)        |                   | 0.21     |
| 4 | <b>Trauma: Orthopedic Injuries and Other</b>                                                                   | <b>22,429</b> | <b>8,275</b> | <b>4.1</b> | <b>(4, 4.2)</b>   | <b>&lt;0.0001</b> | <b>-</b> |
|   | S62 Fracture at wrist and hand level                                                                           | 2,541         | 827          | 3.3        | (3, 3.6)          |                   | 0.47     |
|   | S69 Other and unspecified injuries of wrist, hand and finger(s)                                                | 1,906         | 771          | 2.5        | (2.3, 2.8)        |                   | 0.46     |
|   | W22 Striking against or struck by other objects                                                                | 5,442         | 1,200        | 5.1        | (4.8, 5.5)        |                   | 0.41     |
|   | S60 Superficial injury of wrist, hand and fingers                                                              | 2,818         | 826          | 3.6        | (3.3, 3.9)        |                   | 0.41     |
|   | S63 Dislocation and sprain of joints and ligaments at wrist and hand level                                     | 1,805         | 563          | 3.4        | (3, 3.7)          |                   | 0.40     |
|   | S52 Fracture of forearm                                                                                        | 1,801         | 807          | 2.3        | (2.1, 2.5)        |                   | 0.39     |
|   | W21 Striking against or struck by sports equipment                                                             | 2,084         | 379          | 6.0        | (5.3, 6.7)        |                   | 0.38     |
|   | Z47 Orthopedic aftercare                                                                                       | 845           | 337          | 2.6        | (2.3, 2.9)        |                   | 0.36     |
|   | W51 Accidental striking against or bumped into by another person                                               | 2,684         | 553          | 5.5        | (5, 6.1)          |                   | 0.35     |
|   | W02 Fall involving ice-skates, skis, roller-skates or skateboards                                              | 1,561         | 499          | 3.2        | (2.9, 3.6)        |                   | 0.35     |
|   | W23 Caught, crushed, jammed or pinched in or between objects                                                   | 1,351         | 460          | 3.0        | (2.7, 3.3)        |                   | 0.32     |
|   | S50 Superficial injury of elbow and forearm                                                                    | 1,283         | 308          | 4.3        | (3.8, 4.9)        |                   | 0.27     |
|   | W19 Unspecified fall                                                                                           | 3,376         | 848          | 4.2        | (3.9, 4.5)        |                   | 0.26     |
|   | S59 Other and unspecified injuries of elbow and forearm                                                        | 571           | 221          | 2.6        | (2.2, 3)          |                   | 0.25     |
|   | V18 Pedal cycle rider injured in noncollision transport accident                                               | 1,045         | 316          | 3.4        | (3, 3.8)          |                   | 0.25     |
|   | X59 Exposure to unspecified factor                                                                             | 4,311         | 1,366        | 3.4        | (3.1, 3.6)        |                   | 0.22     |
|   | W18 Other slipping, tripping and stumbling and falls                                                           | 2,258         | 500          | 4.7        | (4.3, 5.2)        |                   | 0.22     |
|   | W01 Fall on same level from slipping, tripping and stumbling                                                   | 4,015         | 1,139        | 3.8        | (3.6, 4.1)        |                   | 0.22     |
|   | S90 Superficial injury of ankle, foot and toes                                                                 | 2,093         | 681          | 3.2        | (2.9, 3.5)        |                   | 0.22     |
|   | X50 Overexertion and strenuous or repetitive movements                                                         | 4,765         | 1,870        | 2.7        | (2.6, 2.9)        |                   | 0.21     |
|   | W50 Accidental hit, strike, kick, twist, bite or scratch by another person                                     | 926           | 158          | 6.0        | (5.1, 7.1)        |                   | 0.21     |
| 5 | <b>Nephrology: Disorders of Renal Function and Therapy</b>                                                     | <b>1,160</b>  | <b>535</b>   | <b>2.3</b> | <b>(2.1, 2.5)</b> | <b>&lt;0.0001</b> | <b>-</b> |
|   | N18 Chronic kidney disease (CKD)                                                                               | 470           | 187          | 2.6        | (2.2, 3.1)        |                   | 0.70     |
|   | Z49 Encounter for care involving renal dialysis                                                                | 75            | 29           | 2.6        | (1.7, 4)          |                   | 0.68     |
|   | Z99 Dependence on enabling machines and devices, not elsewhere classified                                      | 99            | 33           | 3.0        | (2, 4.4)          |                   | 0.65     |
|   | I12 Hypertensive chronic kidney disease                                                                        | 151           | 80           | 1.9        | (1.5, 2.5)        |                   | 0.60     |
|   | N08 Glomerular disorders in diseases classified elsewhere                                                      | 297           | 84           | 3.6        | (2.8, 4.6)        |                   | 0.56     |
|   | N19 Unspecified kidney failure                                                                                 | 176           | 94           | 1.9        | (1.5, 2.4)        |                   | 0.36     |
|   | T82 Complications of cardiac and vascular prosthetic devices, implants and grafts                              | 198           | 110          | 1.8        | (1.4, 2.3)        |                   | 0.33     |
|   | N17 Acute kidney failure                                                                                       | 637           | 234          | 2.8        | (2.4, 3.3)        |                   | 0.31     |
| 6 | <b>Dermatology/Osteopathy/Orthopedy: Skin/Superficial Lesions, Vascular/Lymphatic Pathology, and Back Pain</b> | <b>15,166</b> | <b>8,237</b> | <b>2.2</b> | <b>(2.1, 2.3)</b> | <b>&lt;0.0001</b> | <b>-</b> |
|   | L03 Cellulitis and acute lymphangitis                                                                          | 2,334         | 999          | 2.4        | (2.2, 2.6)        |                   | 0.45     |
|   | Z51 Encounter for other aftercare                                                                              | 1,217         | 608          | 2.0        | (1.8, 2.2)        |                   | 0.41     |
|   | M79 Other and unspecified soft tissue disorders, not elsewhere classified                                      | 2,935         | 1,386        | 2.2        | (2.1, 2.3)        |                   | 0.32     |
|   | L02 Cutaneous abscess, furuncle and carbuncle                                                                  | 607           | 242          | 2.5        | (2.2, 2.9)        |                   | 0.27     |
|   | M25 Other joint disorder, not elsewhere classified                                                             | 1,896         | 895          | 2.1        | (2, 2.3)          |                   | 0.27     |
|   | M54 Dorsalgia                                                                                                  | 3,550         | 1,486        | 2.5        | (2.4, 2.7)        |                   | 0.26     |
|   | R22 Localized swelling, mass and lump of skin and subcutaneous tissue                                          | 777           | 417          | 1.9        | (1.7, 2.1)        |                   | 0.25     |
|   | L08 Other local infections of skin and subcutaneous tissue                                                     | 504           | 193          | 2.6        | (2.2, 3.1)        |                   | 0.25     |
|   | Z09 Follow-up examination after treatment for conditions other than malignant neoplasms                        | 1,653         | 1,187        | 1.4        | (1.3, 1.5)        |                   | 0.25     |

|    |                                                                                                   |               |              |            |                   |                   |
|----|---------------------------------------------------------------------------------------------------|---------------|--------------|------------|-------------------|-------------------|
|    | I80 Phlebitis and thrombophlebitis                                                                | 488           | 241          | 2.1        | (1.8, 2.4)        | 0.24              |
|    | R07 Pain in throat and chest                                                                      | 5,419         | 2,502        | 2.3        | (2.2, 2.4)        | 0.22              |
|    | Z48 Encounter for other postprocedural aftercare                                                  | 1,325         | 607          | 2.2        | (2, 2.5)          | 0.22              |
|    | Z76 Persons encountering health services in other circumstances                                   | 1,082         | 416          | 2.7        | (2.4, 3)          | 0.21              |
|    | L97 Non-pressure chronic ulcer of lower limb, not elsewhere classified                            | 127           | 66           | 1.9        | (1.4, 2.6)        | 0.21              |
| 7  | <b>Environmental Exposures: Burns</b>                                                             | <b>661</b>    | <b>262</b>   | <b>2.6</b> | <b>(2.2, 2.9)</b> | <b>&lt;0.0001</b> |
|    | T31 Burns classified according to extent of body surface involved                                 | 404           | 148          | 2.8        | (2.3, 3.3)        | 0.87              |
|    | T23 Burn and corrosion of wrist and hand                                                          | 249           | 107          | 2.3        | (1.9, 2.9)        | 0.62              |
|    | X10 Contact with hot drinks, food, fats and cooking oils                                          | 129           | 53           | 2.5        | (1.8, 3.4)        | 0.51              |
|    | T22 Burn and corrosion of shoulder and upper limb, except wrist and hand                          | 108           | 42           | 2.6        | (1.8, 3.7)        | 0.45              |
|    | X12 Contact with other hot fluids                                                                 | 78            | 42           | 1.9        | (1.3, 2.7)        | 0.42              |
|    | T21 Burn and corrosion of trunk                                                                   | 69            | 21           | 3.4        | (2.1, 5.6)        | 0.39              |
|    | T24 Burn and corrosion of lower limb, except ankle and foot                                       | 85            | 34           | 2.5        | (1.7, 3.7)        | 0.38              |
|    | X15 Contact with hot household appliances                                                         | 63            | 16           | 3.9        | (2.3, 6.8)        | 0.37              |
|    | T20 Burn and corrosion of head, face, and neck                                                    | 68            | 24           | 2.8        | (1.8, 4.5)        | 0.34              |
|    | T25 Burn and corrosion of ankle and foot                                                          | 60            | 22           | 2.7        | (1.7, 4.4)        | 0.32              |
|    | X09 Exposure to unspecified smoke, fire and flames                                                | 59            | 18           | 3.3        | (1.9, 5.6)        | 0.25              |
|    | X19 Contact with other heat and hot substances                                                    | 52            | 21           | 2.5        | (1.5, 4.1)        | 0.23              |
|    | X11 Contact with hot tap-water                                                                    | 26            | 14           | 1.9        | (1, 3.6)          | 0.23              |
|    | X08 Exposure to other specified smoke, fire and flames                                            | 60            | 11           | 5.5        | (2.9, 10.4)       | 0.20              |
| 8  | <b>Otolaryngology: Respiratory Infections of Upper Airway, Ear and Nose</b>                       | <b>13,054</b> | <b>7,749</b> | <b>2.0</b> | <b>(2, 2.1)</b>   | <b>&lt;0.0001</b> |
|    | H66 Suppurative and unspecified otitis media                                                      | 2,396         | 1,474        | 1.8        | (1.6, 1.9)        | 0.54              |
|    | J06 Acute upper respiratory infections of multiple and unspecified sites                          | 4,544         | 2,480        | 2.0        | (1.9, 2.1)        | 0.48              |
|    | J02 Acute pharyngitis                                                                             | 3,633         | 1,959        | 2.0        | (1.9, 2.1)        | 0.41              |
|    | R50 Fever of other and unknown origin                                                             | 1,763         | 1,282        | 1.4        | (1.3, 1.5)        | 0.39              |
|    | H92 Otaigia and effusion of ear                                                                   | 871           | 642          | 1.4        | (1.2, 1.5)        | 0.38              |
|    | B34 Viral infection of unspecified site                                                           | 2,207         | 1,024        | 2.3        | (2.1, 2.4)        | 0.33              |
|    | R21 Rash and other nonspecific skin eruption                                                      | 1,307         | 810          | 1.6        | (1.5, 1.8)        | 0.31              |
|    | R05 Cough                                                                                         | 1,694         | 1,169        | 1.5        | (1.4, 1.6)        | 0.31              |
|    | J05 Acute obstructive laryngitis [croup] and epiglottitis                                         | 503           | 283          | 1.8        | (1.6, 2.2)        | 0.30              |
|    | J03 Acute tonsillitis                                                                             | 781           | 464          | 1.7        | (1.5, 1.9)        | 0.29              |
|    | H60 Otitis externa                                                                                | 889           | 451          | 2.0        | (1.8, 2.2)        | 0.26              |
|    | H10 Conjunctivitis                                                                                | 1,057         | 608          | 1.8        | (1.6, 2)          | 0.25              |
|    | J20 Acute bronchitis                                                                              | 796           | 408          | 2.0        | (1.8, 2.2)        | 0.23              |
| 9  | <b>Gastroenterology: Liver Disorders and Other</b>                                                | <b>417</b>    | <b>132</b>   | <b>3.2</b> | <b>(2.6, 3.9)</b> | <b>&lt;0.0001</b> |
|    | K74 Fibrosis and cirrhosis of liver                                                               | 107           | 23           | 4.7        | (3, 7.3)          | 0.72              |
|    | K72 Hepatic failure, not elsewhere classified                                                     | 64            | 12           | 5.7        | (3, 10.9)         | 0.61              |
|    | R18 Ascites                                                                                       | 105           | 20           | 5.3        | (3.3, 8.5)        | 0.60              |
|    | I85 Esophageal varices                                                                            | 59            | 20           | 3.1        | (1.8, 5.1)        | 0.60              |
|    | K76 Other diseases of liver                                                                       | 129           | 43           | 3.0        | (2.1, 4.2)        | 0.59              |
|    | K70 Alcoholic liver disease                                                                       | 143           | 23           | 6.5        | (4.1, 10.1)       | 0.55              |
|    | B18 Chronic viral hepatitis                                                                       | 86            | 26           | 3.5        | (2.2, 5.5)        | 0.39              |
|    | D61 Other aplastic anemias and other bone marrow failure syndromes                                | 55            | 20           | 2.8        | (1.6, 4.6)        | 0.21              |
| 10 | <b>Emergency Medicine: Pulmonary, Abdominal and Other</b>                                         | <b>3,237</b>  | <b>1,766</b> | <b>2.0</b> | <b>(1.9, 2.1)</b> | <b>&lt;0.0001</b> |
|    | A41 Other sepsis                                                                                  | 299           | 124          | 2.5        | (2, 3.1)          | 0.52              |
|    | J17 Pneumonia in diseases classified elsewhere                                                    | 49            | 27           | 1.8        | (1.1, 2.9)        | 0.46              |
|    | J96 Respiratory failure, not elsewhere classified                                                 | 121           | 70           | 1.7        | (1.3, 2.3)        | 0.42              |
|    | R57 Shock, not elsewhere classified                                                               | 68            | 41           | 1.7        | (1.1, 2.4)        | 0.40              |
|    | N17 Acute kidney failure                                                                          | 637           | 234          | 2.8        | (2.4, 3.3)        | 0.32              |
|    | B95 Streptococcus, Staphylococcus, and Enterococcus as the cause of diseases classified elsewhere | 449           | 267          | 1.7        | (1.5, 2)          | 0.30              |
|    | B96 Other bacterial agents as the cause of diseases classified elsewhere                          | 898           | 624          | 1.5        | (1.3, 1.6)        | 0.27              |
|    | E87 Other disorders of fluid, electrolyte and acid-base balance                                   | 996           | 421          | 2.5        | (2.2, 2.8)        | 0.27              |
|    | L89 Pressure ulcer                                                                                | 61            | 28           | 2.2        | (1.4, 3.4)        | 0.26              |
|    | F05 Delirium, not induced by alcohol and other psychoactive substances                            | 455           | 102          | 4.6        | (3.7, 5.8)        | 0.25              |
|    | U82 Resistance to betalactam antibiotics                                                          | 79            | 29           | 2.7        | (1.8, 4.2)        | 0.25              |
|    | J15 Bacterial pneumonia, not elsewhere classified                                                 | 64            | 26           | 2.5        | (1.6, 3.9)        | 0.23              |
|    | Z75 Problems related to medical facilities and other health care                                  | 824           | 363          | 2.4        | (2.1, 2.7)        | 0.23              |
|    | J90 Pleural effusion, not elsewhere classified                                                    | 237           | 115          | 2.1        | (1.7, 2.6)        | 0.22              |

|    |                                                                                                                                                           |               |              |            |                   |                   |          |
|----|-----------------------------------------------------------------------------------------------------------------------------------------------------------|---------------|--------------|------------|-------------------|-------------------|----------|
|    | J69 Pneumonitis due to solids and liquids                                                                                                                 | 100           | 32           | 3.1        | (2.1, 4.7)        |                   | 0.20     |
|    | A49 Bacterial infection of unspecified site                                                                                                               | 96            | 39           | 2.5        | (1.7, 3.6)        |                   | 0.20     |
| 11 | <b>Gastroenterology: Metabolic Disorders and Adbominal Symptoms</b>                                                                                       | <b>13,138</b> | <b>8,072</b> | <b>1.9</b> | <b>(1.8, 2)</b>   | <b>&lt;0.0001</b> | <b>-</b> |
|    | K29 Gastritis and duodenitis                                                                                                                              | 1,264         | 892          | 1.4        | (1.3, 1.6)        |                   | 0.38     |
|    | D63 Anemia in chronic diseases classified elsewhere                                                                                                       | 123           | 44           | 2.8        | (2, 3.9)          |                   | 0.34     |
|    | D64 Other anemias                                                                                                                                         | 889           | 510          | 1.8        | (1.6, 2)          |                   | 0.33     |
|    | K92 Other diseases of digestive system                                                                                                                    | 847           | 415          | 2.1        | (1.8, 2.3)        |                   | 0.31     |
|    | Z85 Personal history of malignant neoplasm                                                                                                                | 812           | 721          | 1.1        | (1, 1.3)          |                   | 0.27     |
|    | E87 Other disorders of fluid, electrolyte and acid-base balance                                                                                           | 996           | 421          | 2.5        | (2.2, 2.8)        |                   | 0.26     |
|    | D50 Iron deficiency anemia                                                                                                                                | 255           | 181          | 1.4        | (1.2, 1.7)        |                   | 0.26     |
|    | D46 Myelodysplastic syndromes                                                                                                                             | NR            | <6           | 8.8        | (3.1, 24.6)       |                   | 0.25     |
|    | E86 Volume depletion                                                                                                                                      | 898           | 401          | 2.3        | (2, 2.6)          |                   | 0.25     |
|    | R11 Nausea and vomiting                                                                                                                                   | 2,135         | 1,132        | 1.9        | (1.8, 2.1)        |                   | 0.25     |
|    | E83 Disorders of mineral metabolism                                                                                                                       | 168           | 72           | 2.3        | (1.8, 3.1)        |                   | 0.23     |
|    | K21 Gastro-esophageal reflux disease                                                                                                                      | 926           | 640          | 1.5        | (1.3, 1.6)        |                   | 0.23     |
|    | I10 Essential (primary) hypertension                                                                                                                      | 2,972         | 1,915        | 1.7        | (1.6, 1.8)        |                   | 0.21     |
|    | D61 Other aplastic anemias and other bone marrow failure syndromes                                                                                        | 55            | 20           | 2.8        | (1.6, 4.6)        |                   | 0.21     |
|    | R10 Abdominal and pelvic pain                                                                                                                             | 6,999         | 3,715        | 2.1        | (2, 2.1)          |                   | 0.21     |
|    | K56 Paralytic ileus and intestinal obstruction without hernia                                                                                             | 353           | 251          | 1.4        | (1.2, 1.7)        |                   | 0.21     |
|    | N17 Acute kidney failure                                                                                                                                  | 637           | 234          | 2.8        | (2.4, 3.3)        |                   | 0.21     |
|    | D69 Purpura and other hemorrhagic conditions                                                                                                              | 181           | 72           | 2.5        | (1.9, 3.3)        |                   | 0.20     |
|    | C79 Secondary malignant neoplasm of other and unspecified sites                                                                                           | 88            | 25           | 3.5        | (2.3, 5.5)        |                   | 0.20     |
| 12 | <b>Neurology: Stroke and Emergencies Involving the Brain</b>                                                                                              | <b>3,923</b>  | <b>2,332</b> | <b>1.9</b> | <b>(1.8, 2)</b>   | <b>&lt;0.0001</b> | <b>-</b> |
|    | G81 Hemiplegia and hemiparesis                                                                                                                            | 109           | 49           | 2.2        | (1.6, 3.1)        |                   | 0.60     |
|    | I63 Cerebral infarction                                                                                                                                   | 302           | 113          | 2.8        | (2.2, 3.4)        |                   | 0.60     |
|    | I47 Speech disturbances, not elsewhere classified                                                                                                         | 157           | 61           | 2.6        | (1.9, 3.5)        |                   | 0.53     |
|    | I64 Stroke, not specified as haemorrhage or infarction                                                                                                    | 435           | 170          | 2.6        | (2.2, 3.1)        |                   | 0.52     |
|    | I69 Sequelae of cerebrovascular disease                                                                                                                   | 122           | 40           | 3.1        | (2.2, 4.5)        |                   | 0.48     |
|    | Z75 Problems related to medical facilities and other health care                                                                                          | 824           | 363          | 2.4        | (2.1, 2.7)        |                   | 0.27     |
|    | I61 Nontraumatic intracerebral hemorrhage                                                                                                                 | 73            | 23           | 3.2        | (2, 5.1)          |                   | 0.27     |
|    | G45 Transient cerebral ischemic attacks and related syndromes                                                                                             | 514           | 224          | 2.4        | (2, 2.8)          |                   | 0.27     |
|    | I67 Other cerebrovascular diseases                                                                                                                        | 75            | 26           | 3.0        | (1.9, 4.7)        |                   | 0.24     |
|    | I10 Essential (primary) hypertension                                                                                                                      | 2,972         | 1,915        | 1.7        | (1.6, 1.8)        |                   | 0.24     |
|    | I62 Other and unspecified nontraumatic intracranial hemorrhage                                                                                            | 109           | 23           | 4.7        | (3, 7.4)          |                   | 0.21     |
| 13 | <b>Pharmacology Emergencies: Adverse Drug Effects of Medications Crossing Blood-Brain Barrier</b>                                                         | <b>508</b>    | <b>112</b>   | <b>4.6</b> | <b>(3.7, 5.6)</b> | <b>&lt;0.0001</b> | <b>-</b> |
|    | T42 Poisoning by, adverse effect of and underdosing of antiepileptic, sedative- hypnotic and antiparkinsonism drugs                                       | 295           | 52           | 5.7        | (4.2, 7.6)        |                   | 0.72     |
|    | X61 Intentional self-poisoning by and exposure to antiepileptic, sedative- hypnotic, antiparkinsonism and psychotropic drugs, not elsewhere classified    | 294           | 72           | 4.1        | (3.2, 5.3)        |                   | 0.69     |
|    | T43 Poisoning by, adverse effect of and underdosing of psychotropic drugs, not elsewhere classified                                                       | 269           | 61           | 4.4        | (3.3, 5.8)        |                   | 0.68     |
|    | X41 Accidental poisoning by and exposure to antiepileptic, sedative- hypnotic, antiparkinsonism and psychotropic drugs, not elsewhere classified          | 146           | 32           | 4.6        | (3.1, 6.7)        |                   | 0.51     |
|    | Y11 Poisoning by and exposure to antiepileptic, sedative-hypnotic, antiparkinsonism and psychotropic drugs, not elsewhere classified, undetermined intent | 106           | 11           | 9.6        | (5.2, 17.9)       |                   | 0.46     |
| 14 | <b>Toxicology: Emergencies and Adversities Due to Substance Abuse</b>                                                                                     | <b>4,503</b>  | <b>1,198</b> | <b>4.1</b> | <b>(3.9, 4.4)</b> | <b>&lt;0.0001</b> | <b>-</b> |
|    | F19 Other psychoactive substance related disorders                                                                                                        | 526           | 110          | 4.9        | (4, 6)            |                   | 0.46     |
|    | F11 Opioid related disorders                                                                                                                              | 244           | 46           | 5.3        | (3.9, 7.3)        |                   | 0.42     |
|    | F14 Cocaine related disorders                                                                                                                             | 245           | 43           | 5.7        | (4.1, 7.9)        |                   | 0.38     |
|    | F10 Alcohol related disorders                                                                                                                             | 1,849         | 374          | 5.2        | (4.6, 5.8)        |                   | 0.34     |
|    | Z76 Persons encountering health services in other circumstances                                                                                           | 1,082         | 416          | 2.7        | (2.4, 3)          |                   | 0.30     |
|    | Y04 Assault by bodily force                                                                                                                               | 1,564         | 140          | 12.0       | (10.1, 14.4)      |                   | 0.30     |
|    | Z72 Problems related to lifestyle                                                                                                                         | 544           | 186          | 3.0        | (2.5, 3.5)        |                   | 0.30     |
|    | Z59 Problems related to housing and economic circumstances                                                                                                | 158           | 26           | 6.1        | (4, 9.2)          |                   | 0.27     |
|    | F13 Sedative, hypnotic, or anxiolytic related disorders                                                                                                   | 81            | 13           | 6.2        | (3.5, 11.2)       |                   | 0.25     |
|    | Y09 Assault by unspecified means                                                                                                                          | 130           | 7            | 18.6       | (8.7, 39.7)       |                   | 0.20     |
| 15 | <b>Endocrinology: Diabetes and Diabetic Consequences</b>                                                                                                  | <b>3,336</b>  | <b>1,938</b> | <b>1.9</b> | <b>(1.8, 2)</b>   | <b>&lt;0.0001</b> | <b>-</b> |
|    | E14 Unspecified diabetes mellitus                                                                                                                         | 1,720         | 920          | 1.9        | (1.8, 2.1)        |                   | 0.63     |
|    | E11 Type 2 diabetes mellitus                                                                                                                              | 2,507         | 1,337        | 2.0        | (1.9, 2.2)        |                   | 0.59     |



|    |                                                                                                            |               |              |            |                   |                   |
|----|------------------------------------------------------------------------------------------------------------|---------------|--------------|------------|-------------------|-------------------|
|    | E10 Type 1 diabetes mellitus                                                                               | 429           | 213          | 2.0        | (1.7, 2.4)        | 0.55              |
|    | R73 Elevated blood glucose level                                                                           | 414           | 254          | 1.6        | (1.4, 1.9)        | 0.54              |
|    | H36 Retinal disorders in diseases classified elsewhere                                                     | 67            | 36           | 1.9        | (1.2, 2.8)        | 0.34              |
|    | N08 Glomerular disorders in diseases classified elsewhere                                                  | 297           | 84           | 3.6        | (2.8, 4.6)        | 0.33              |
|    | I79 Disorders of arteries, arterioles and capillaries in diseases classified elsewhere                     | 59            | 23           | 2.6        | (1.6, 4.2)        | 0.33              |
|    | L97 Non-pressure chronic ulcer of lower limb, not elsewhere classified                                     | 127           | 66           | 1.9        | (1.4, 2.6)        | 0.31              |
|    | G63 Polyneuropathy in diseases classified elsewhere                                                        | 72            | 21           | 3.4        | (2.1, 5.6)        | 0.30              |
|    | M86 Osteomyelitis                                                                                          | 93            | 44           | 2.1        | (1.5, 3)          | 0.26              |
| 16 | <b>Gastroenterology and Obstetrics: Conditions and Symptoms of Abdomen and Pelvis</b>                      | <b>12,554</b> | <b>7,130</b> | <b>2.0</b> | <b>(2, 2.1)</b>   | <b>&lt;0.0001</b> |
|    | R10 Abdominal and pelvic pain                                                                              | 6,999         | 3,715        | 2.1        | (2, 2.1)          | 0.48              |
|    | N83 Noninflammatory disorders of ovary, fallopian tube and broad ligament                                  | 453           | 192          | 2.4        | (2, 2.8)          | 0.40              |
|    | Z33 Pregnant state                                                                                         | 321           | 225          | 1.5        | (1.2, 1.7)        | 0.36              |
|    | N93 Other abnormal uterine and vaginal bleeding                                                            | 403           | 274          | 1.5        | (1.3, 1.8)        | 0.32              |
|    | Z32 Encounter for pregnancy test and childbirth and childcare instruction                                  | 150           | 87           | 1.7        | (1.3, 2.3)        | 0.30              |
|    | N94 Pain and other conditions associated with female genital organs and menstrual cycle                    | 244           | 141          | 1.7        | (1.4, 2.1)        | 0.30              |
|    | N73 Other female pelvic inflammatory diseases                                                              | 122           | 70           | 1.7        | (1.3, 2.3)        | 0.30              |
|    | N39 Other disorders of urinary system                                                                      | 3,480         | 1,965        | 1.9        | (1.8, 2)          | 0.27              |
|    | K37 Unspecified appendicitis                                                                               | 370           | 117          | 3.2        | (2.6, 3.9)        | 0.26              |
|    | Z71 Persons encountering health services for other counseling and medical advice, not elsewhere classified | 1,813         | 757          | 2.5        | (2.3, 2.7)        | 0.25              |
|    | G43 Migraine                                                                                               | 1,028         | 315          | 3.3        | (2.9, 3.8)        | 0.23              |
|    | K35 Acute appendicitis                                                                                     | 315           | 258          | 1.2        | (1, 1.4)          | 0.22              |
|    | N12 Tubulo-interstitial nephritis, not specified as acute or chronic                                       | 424           | 179          | 2.4        | (2, 2.8)          | 0.22              |
|    | R11 Nausea and vomiting                                                                                    | 2,135         | 1,132        | 1.9        | (1.8, 2.1)        | 0.21              |
| 17 | <b>Cardiology: Chronic Cardiovascular Pathology and Other</b>                                              | <b>2,615</b>  | <b>1,339</b> | <b>2.2</b> | <b>(2, 2.4)</b>   | <b>&lt;0.0001</b> |
|    | Y44 Agents primarily affecting blood constituents                                                          | 159           | 66           | 2.4        | (1.8, 3.2)        | 0.63              |
|    | D68 Other coagulation defects                                                                              | 194           | 70           | 2.8        | (2.1, 3.6)        | 0.55              |
|    | R78 Findings of drugs and other substances, not normally found in blood                                    | 166           | 54           | 3.2        | (2.3, 4.4)        | 0.53              |
|    | Z92 Personal history of medical treatment                                                                  | 447           | 185          | 2.5        | (2.1, 2.9)        | 0.47              |
|    | I48 Atrial fibrillation and flutter                                                                        | 1,393         | 682          | 2.2        | (2, 2.5)          | 0.42              |
|    | I50 Heart failure                                                                                          | 1,024         | 473          | 2.3        | (2, 2.5)          | 0.33              |
|    | I80 Phlebitis and thrombophlebitis                                                                         | 488           | 241          | 2.1        | (1.8, 2.4)        | 0.21              |
| 18 | <b>Trauma: Superficial Injuries and Other</b>                                                              | <b>8,638</b>  | <b>3,067</b> | <b>3.2</b> | <b>(3.1, 3.3)</b> | <b>&lt;0.0001</b> |
|    | V43 Car occupant injured in collision with car, pick-up truck or van                                       | 899           | 231          | 4.0        | (3.5, 4.6)        | 0.37              |
|    | S20 Superficial injury of thorax                                                                           | 1,209         | 296          | 4.2        | (3.7, 4.8)        | 0.28              |
|    | S30 Superficial injury of abdomen, lower back, pelvis and external genitals                                | 868           | 221          | 4.0        | (3.4, 4.6)        | 0.28              |
|    | S19 Other specified and unspecified injuries of neck                                                       | 329           | 81           | 4.1        | (3.2, 5.3)        | 0.26              |
|    | S10 Superficial injury of neck                                                                             | 368           | 97           | 3.8        | (3.1, 4.8)        | 0.26              |
|    | S39 Other and unspecified injuries of abdomen, lower back, pelvis and external genitals                    | 799           | 227          | 3.6        | (3.1, 4.2)        | 0.26              |
|    | T00 Superficial injuries involving multiple body regions                                                   | 551           | 155          | 3.6        | (3, 4.3)          | 0.26              |
|    | M54 Dorsalgia                                                                                              | 3,550         | 1,486        | 2.5        | (2.4, 2.7)        | 0.25              |
|    | S40 Superficial injury of shoulder and upper arm                                                           | 1,034         | 250          | 4.2        | (3.7, 4.8)        | 0.25              |
|    | V89 Motor- or nonmotor-vehicle accident, type of vehicle unspecified                                       | 135           | 32           | 4.2        | (2.9, 6.2)        | 0.23              |
|    | T14 Injury of unspecified body region                                                                      | 428           | 161          | 2.7        | (2.2, 3.2)        | 0.22              |
|    | S49 Other and unspecified injuries of shoulder and upper arm                                               | 773           | 237          | 3.3        | (2.8, 3.8)        | 0.22              |
|    | T09 Other injuries of spine and trunk, level unspecified                                                   | 411           | 106          | 3.9        | (3.2, 4.9)        | 0.20              |
| 19 | <b>Infectious Diseases and Respiriology: Acute and Chronic Disorders of Airway and Lung</b>                | <b>13,938</b> | <b>7,653</b> | <b>2.1</b> | <b>(2.1, 2.2)</b> | <b>&lt;0.0001</b> |
|    | R06 Abnormalities of breathing                                                                             | 1,933         | 1,076        | 1.8        | (1.7, 2)          | 0.45              |
|    | J45 Asthma                                                                                                 | 1,811         | 1,029        | 1.8        | (1.7, 1.9)        | 0.42              |
|    | J18 Pneumonia, unspecified organism                                                                        | 2,553         | 1,203        | 2.2        | (2.1, 2.4)        | 0.42              |
|    | R05 Cough                                                                                                  | 1,694         | 1,169        | 1.5        | (1.4, 1.6)        | 0.37              |
|    | J44 Other chronic obstructive pulmonary disease                                                            | 849           | 467          | 1.9        | (1.7, 2.1)        | 0.35              |
|    | J98 Other respiratory disorders                                                                            | 693           | 331          | 2.1        | (1.9, 2.4)        | 0.31              |
|    | J06 Acute upper respiratory infections of multiple and unspecified sites                                   | 4,544         | 2,480        | 2.0        | (1.9, 2.1)        | 0.29              |

|    |                                                                                                                                                                                     |              |              |            |                   |                   |          |
|----|-------------------------------------------------------------------------------------------------------------------------------------------------------------------------------------|--------------|--------------|------------|-------------------|-------------------|----------|
|    | J40 Bronchitis, not specified as acute or chronic                                                                                                                                   | 1,227        | 592          | 2.1        | (1.9, 2.3)        |                   | 0.28     |
|    | J20 Acute bronchitis                                                                                                                                                                | 796          | 408          | 2.0        | (1.8, 2.2)        |                   | 0.23     |
|    | R07 Pain in throat and chest                                                                                                                                                        | 5,419        | 2,502        | 2.3        | (2.2, 2.4)        |                   | 0.20     |
| 20 | <b>Toxicology: Alcohol-Related Emergencies</b>                                                                                                                                      | <b>186</b>   | <b>36</b>    | <b>5.2</b> | <b>(3.6, 7.4)</b> | <b>&lt;0.0001</b> | <b>-</b> |
|    | T51 Toxic effect of alcohol                                                                                                                                                         | 135          | 27           | 5.0        | (3.3, 7.6)        |                   | 0.90     |
|    | X45 Accidental poisoning by and exposure to alcohol                                                                                                                                 | 56           | 13           | 4.3        | (2.4, 7.9)        |                   | 0.66     |
|    | Y15 Poisoning by and exposure to alcohol, undetermined intent                                                                                                                       | NR           | <6           | 10.3       | (3.2, 33.8)       |                   | 0.56     |
|    | X65 Intentional self-poisoning by and exposure to alcohol                                                                                                                           | 52           | 11           | 4.7        | (2.5, 9.1)        |                   | 0.54     |
|    | Y90 Evidence of alcohol involvement determined by blood alcohol level                                                                                                               | 54           | 6            | 9.0        | (3.9, 20.9)       |                   | 0.20     |
| 21 | <b>Psychiatry: Schizophrenia and Delusional Disorders</b>                                                                                                                           | <b>1,004</b> | <b>334</b>   | <b>3.1</b> | <b>(2.7, 3.5)</b> | <b>&lt;0.0001</b> | <b>-</b> |
|    | F20 Schizophrenia                                                                                                                                                                   | 172          | 74           | 2.3        | (1.8, 3.1)        |                   | 0.65     |
|    | F29 Unspecified nonorganic psychosis                                                                                                                                                | 209          | 88           | 2.4        | (1.9, 3)          |                   | 0.58     |
|    | F25 Schizoaffective disorders                                                                                                                                                       | 51           | 19           | 2.7        | (1.6, 4.5)        |                   | 0.56     |
|    | F22 Persistent delusional disorders                                                                                                                                                 | 109          | 37           | 3.0        | (2.1, 4.4)        |                   | 0.50     |
|    | R44 Other symptoms and signs involving general sensations and perceptions                                                                                                           | 152          | 53           | 2.9        | (2.1, 3.9)        |                   | 0.38     |
|    | R46 Symptoms and signs involving appearance and behavior                                                                                                                            | 271          | 67           | 4.0        | (3.1, 5.3)        |                   | 0.33     |
|    | F31 Bipolar disorder                                                                                                                                                                | 271          | 90           | 3.0        | (2.4, 3.8)        |                   | 0.27     |
|    | F99 Mental disorder, not otherwise specified                                                                                                                                        | 56           | 12           | 4.7        | (2.5, 8.7)        |                   | 0.25     |
|    | Z59 Problems related to housing and economic circumstances                                                                                                                          | 158          | 26           | 6.1        | (4, 9.2)          |                   | 0.21     |
| 22 | <b>Pharmacology Emergencies: Poisoning due to Narcotics</b>                                                                                                                         | <b>468</b>   | <b>82</b>    | <b>5.7</b> | <b>(4.5, 7.2)</b> | <b>&lt;0.0001</b> | <b>-</b> |
|    | T40 Poisoning by, adverse effect of and underdosing of narcotics and psychodysleptics [hallucinogens]                                                                               | 249          | 35           | 7.1        | (5, 10.1)         |                   | 0.85     |
|    | X42 Accidental poisoning by and exposure to narcotics and psychodysleptics [hallucinogens], not elsewhere classified                                                                | 121          | 20           | 6.1        | (3.8, 9.7)        |                   | 0.63     |
|    | Y12 Poisoning by and exposure to narcotics and psychodysleptics [hallucinogens], not elsewhere classified, undetermined intent                                                      | 71           | 9            | 7.9        | (3.9, 15.8)       |                   | 0.54     |
|    | X62 Intentional self-poisoning by and exposure to narcotics and psychodysleptics [hallucinogens], not elsewhere classified                                                          | 95           | 13           | 7.3        | (4.1, 13)         |                   | 0.52     |
|    | F11 Opioid related disorders                                                                                                                                                        | 244          | 46           | 5.3        | (3.9, 7.3)        |                   | 0.23     |
| 23 | <b>Trauma: Injuries from Contact With Sharp Instruments and Machinery</b>                                                                                                           | <b>7,528</b> | <b>3,301</b> | <b>2.5</b> | <b>(2.4, 2.7)</b> | <b>&lt;0.0001</b> | <b>-</b> |
|    | S61 Open wound of wrist, hand and fingers                                                                                                                                           | 3,463        | 1,658        | 2.2        | (2.1, 2.3)        |                   | 0.77     |
|    | W26 Contact with knife, sword or dagger                                                                                                                                             | 972          | 441          | 2.2        | (2, 2.5)          |                   | 0.47     |
|    | W45 Foreign body or object entering through skin                                                                                                                                    | 1,272        | 565          | 2.3        | (2.1, 2.6)        |                   | 0.45     |
|    | W25 Contact with sharp glass                                                                                                                                                        | 885          | 309          | 2.9        | (2.5, 3.3)        |                   | 0.39     |
|    | S91 Open wound of ankle, foot and toes                                                                                                                                              | 900          | 381          | 2.4        | (2.1, 2.7)        |                   | 0.34     |
|    | W29 Contact with other powered hand tools and household machinery                                                                                                                   | 283          | 138          | 2.1        | (1.7, 2.5)        |                   | 0.28     |
|    | W49 Exposure to other inanimate mechanical forces                                                                                                                                   | 692          | 250          | 2.8        | (2.4, 3.2)        |                   | 0.28     |
|    | W27 Contact with nonpowered hand tool                                                                                                                                               | 379          | 174          | 2.2        | (1.8, 2.6)        |                   | 0.26     |
|    | S51 Open wound of elbow and forearm                                                                                                                                                 | 669          | 183          | 3.7        | (3.1, 4.3)        |                   | 0.23     |
|    | Z48 Encounter for other postprocedural aftercare                                                                                                                                    | 1,325        | 607          | 2.2        | (2, 2.5)          |                   | 0.22     |
|    | W31 Contact with other and unspecified machinery                                                                                                                                    | 257          | 139          | 1.9        | (1.5, 2.3)        |                   | 0.22     |
|    | W23 Caught, crushed, jammed or pinched in or between objects                                                                                                                        | 1,351        | 460          | 3.0        | (2.7, 3.3)        |                   | 0.21     |
| 24 | <b>Pharmacology Emergencies and Toxicology: Poisoning due to Hormones, Cardiovascular Drugs and Other</b>                                                                           | <b>420</b>   | <b>159</b>   | <b>2.7</b> | <b>(2.2, 3.2)</b> | <b>&lt;0.0001</b> | <b>-</b> |
|    | X44 Accidental poisoning by and exposure to other and unspecified drugs, medicaments and biological substances                                                                      | 181          | 74           | 2.4        | (1.9, 3.2)        |                   | 0.60     |
|    | T50 Poisoning by, adverse effect of and underdosing of diuretics and other and unspecified drugs, medicaments and biological substances                                             | 187          | 51           | 3.7        | (2.7, 5)          |                   | 0.59     |
|    | X64 Intentional self-poisoning by and exposure to other and unspecified drugs, medicaments and biological substances                                                                | 132          | 42           | 3.1        | (2.2, 4.4)        |                   | 0.55     |
|    | Y14 Poisoning by and exposure to other and unspecified drugs, medicaments and biological substances, undetermined intent                                                            | 59           | 21           | 2.8        | (1.7, 4.6)        |                   | 0.44     |
|    | T45 Poisoning by, adverse effect of and underdosing of primarily systemic and hematological agents, not elsewhere classified                                                        | 83           | 32           | 2.6        | (1.7, 3.9)        |                   | 0.42     |
|    | T38 Poisoning by, adverse effect of and underdosing of hormones and their synthetic substitutes and antagonists, not elsewhere classified                                           | 26           | 10           | 2.6        | (1.3, 5.4)        |                   | 0.40     |
|    | T46 Poisoning by, adverse effect of and underdosing of agents primarily affecting the cardiovascular system                                                                         | 35           | 18           | 1.9        | (1.1, 3.4)        |                   | 0.36     |
|    | T49 Poisoning by, adverse effect of and underdosing of topical agents primarily affecting skin and mucous membrane and by ophthalmological, otorhinolaryngological and dental drugs | 19           | 6            | 3.2        | (1.3, 7.9)        |                   | 0.29     |

|    |                                                                                                                                                                                               |               |              |            |                    |                   |          |
|----|-----------------------------------------------------------------------------------------------------------------------------------------------------------------------------------------------|---------------|--------------|------------|--------------------|-------------------|----------|
| 25 | <b>Pharmacology Emergencies: Poisoning by Pain Killers and Anti-Inflammatory Drugs</b>                                                                                                        | <b>295</b>    | <b>77</b>    | <b>3.8</b> | <b>(3 , 4.9)</b>   | <b>&lt;0.0001</b> | <b>-</b> |
|    | T39 Poisoning by, adverse effect of and underdosing of nonopioid analgesics, antipyretics and antirheumatics                                                                                  | 274           | 73           | 3.8        | (2.9 , 4.9)        |                   | 0.90     |
|    | X60 Intentional self-poisoning by and exposure to nonopioid analgesics, antipyretics and antirheumatics                                                                                       | 190           | 48           | 4.0        | (2.9 , 5.4)        |                   | 0.70     |
|    | X40 Accidental poisoning by and exposure to nonopioid analgesics, antipyretics and antirheumatics                                                                                             | 76            | 23           | 3.3        | (2.1 , 5.3)        |                   | 0.55     |
|    | Y10 Poisoning by and exposure to nonopioid analgesics, antipyretics and antirheumatics, undetermined intent                                                                                   | 36            | 11           | 3.3        | (1.7 , 6.4)        |                   | 0.39     |
| 26 | <b>Neurology: Epilepsy, Seizures, Brain Lesions and Other</b>                                                                                                                                 | <b>1,121</b>  | <b>365</b>   | <b>3.1</b> | <b>(2.8 , 3.5)</b> | <b>&lt;0.0001</b> | <b>-</b> |
|    | G40 Epilepsy and recurrent seizures                                                                                                                                                           | 390           | 103          | 3.8        | (3 , 4.7)          |                   | 0.64     |
|    | R56 Convulsions, not elsewhere classified                                                                                                                                                     | 824           | 264          | 3.2        | (2.7 , 3.6)        |                   | 0.60     |
|    | G41 Status epilepticus                                                                                                                                                                        | NR            | <6           | 6.2        | (2.4 , 15.9)       |                   | 0.46     |
|    | Y46 Antiepileptics and antiparkinsonism drugs                                                                                                                                                 | 62            | 8            | 7.8        | (3.7 , 16.2)       |                   | 0.38     |
|    | F44 Dissociative and conversion disorders                                                                                                                                                     | 74            | 19           | 3.9        | (2.4 , 6.4)        |                   | 0.33     |
|    | D43 Neoplasm of uncertain behavior of brain and central nervous system                                                                                                                        | 30            | 9            | 3.3        | (1.6 , 7)          |                   | 0.28     |
|    | G93 Other disorders of brain                                                                                                                                                                  | 102           | 28           | 3.6        | (2.4 , 5.5)        |                   | 0.26     |
|    | C71 Malignant neoplasm of brain                                                                                                                                                               | 37            | 17           | 2.2        | (1.2 , 3.9)        |                   | 0.25     |
| 27 | <b>Trauma: Overexertion and Injuries to the Lower Limb</b>                                                                                                                                    | <b>12,053</b> | <b>4,790</b> | <b>3.0</b> | <b>(2.9 , 3.1)</b> | <b>&lt;0.0001</b> | <b>-</b> |
|    | X50 Overexertion and strenuous or repetitive movements                                                                                                                                        | 4,765         | 1,870        | 2.7        | (2.6 , 2.9)        |                   | 0.53     |
|    | S93 Dislocation and sprain of joints and ligaments at ankle, foot and toe level                                                                                                               | 2,931         | 1,123        | 2.8        | (2.6 , 3)          |                   | 0.46     |
|    | S99 Other and unspecified injuries of ankle and foot                                                                                                                                          | 1,357         | 672          | 2.0        | (1.9 , 2.2)        |                   | 0.33     |
|    | X59 Exposure to unspecified factor                                                                                                                                                            | 4,311         | 1,366        | 3.4        | (3.1 , 3.6)        |                   | 0.32     |
|    | S83 Dislocation and sprain of joints and ligaments of knee                                                                                                                                    | 1,204         | 458          | 2.7        | (2.4 , 3)          |                   | 0.26     |
|    | S90 Superficial injury of ankle, foot and toes                                                                                                                                                | 2,093         | 681          | 3.2        | (2.9 , 3.5)        |                   | 0.25     |
|    | S82 Fracture of lower leg, including ankle                                                                                                                                                    | 1,167         | 482          | 2.5        | (2.2 , 2.7)        |                   | 0.24     |
|    | T78 Adverse effects, not elsewhere classified                                                                                                                                                 | 936           | 395          | 2.4        | (2.1 , 2.7)        |                   | 0.24     |
|    | X58 Exposure to other specified factors                                                                                                                                                       | 1,127         | 338          | 3.4        | (3 , 3.8)          |                   | 0.23     |
| 28 | <b>Nephrology: Genitourinary Disorders, Prosthetic and Other</b>                                                                                                                              | <b>5,379</b>  | <b>3,436</b> | <b>1.7</b> | <b>(1.6 , 1.7)</b> | <b>&lt;0.0001</b> | <b>-</b> |
|    | T83 Complications of genitourinary prosthetic devices, implants and grafts                                                                                                                    | 108           | 71           | 1.5        | (1.1 , 2.1)        |                   | 0.56     |
|    | R33 Retention of urine                                                                                                                                                                        | 469           | 318          | 1.5        | (1.3 , 1.7)        |                   | 0.51     |
|    | Z46 Encounter for fitting and adjustment of other devices                                                                                                                                     | 238           | 196          | 1.2        | (1 , 1.5)          |                   | 0.49     |
|    | R31 Hematuria                                                                                                                                                                                 | 615           | 520          | 1.2        | (1.1 , 1.3)        |                   | 0.41     |
|    | Y84 Other medical procedures as the cause of abnormal reaction of the patient, or of later complication, without mention of misadventure at the time of the procedure                         | 600           | 296          | 2.1        | (1.8 , 2.4)        |                   | 0.39     |
|    | N20 Calculus of kidney and ureter                                                                                                                                                             | 307           | 259          | 1.2        | (1 , 1.4)          |                   | 0.34     |
|    | N39 Other disorders of urinary system                                                                                                                                                         | 3,480         | 1,965        | 1.9        | (1.8 , 2)          |                   | 0.34     |
|    | N23 Unspecified renal colic                                                                                                                                                                   | 487           | 311          | 1.6        | (1.4 , 1.8)        |                   | 0.28     |
|    | N30 Cystitis                                                                                                                                                                                  | 337           | 274          | 1.2        | (1 , 1.4)          |                   | 0.25     |
|    | B96 Other bacterial agents as the cause of diseases classified elsewhere                                                                                                                      | 898           | 624          | 1.5        | (1.3 , 1.6)        |                   | 0.22     |
| 29 | <b>Neurology: Alzheimer's Diseases and Dementia</b>                                                                                                                                           | <b>530</b>    | <b>148</b>   | <b>3.8</b> | <b>(3.2 , 4.6)</b> | <b>&lt;0.0001</b> | <b>-</b> |
|    | G30 Alzheimer's disease                                                                                                                                                                       | 162           | 52           | 3.2        | (2.3 , 4.4)        |                   | 0.92     |
|    | F00 Dementia in Alzheimer disease                                                                                                                                                             | 112           | 39           | 2.9        | (2 , 4.2)          |                   | 0.92     |
|    | F03 Unspecified dementia                                                                                                                                                                      | 422           | 112          | 4.0        | (3.2 , 4.9)        |                   | 0.27     |
| 30 | <b>Emergency Medicine: Foreign Body in Eye, Airway and Other</b>                                                                                                                              | <b>1,682</b>  | <b>624</b>   | <b>2.8</b> | <b>(2.5 , 3.1)</b> | <b>&lt;0.0001</b> | <b>-</b> |
|    | W44 Foreign body entering into or through eye or natural orifice                                                                                                                              | 1,564         | 560          | 2.9        | (2.6 , 3.2)        |                   | 0.91     |
|    | T15 Foreign body on external eye                                                                                                                                                              | 627           | 300          | 2.2        | (1.9 , 2.5)        |                   | 0.63     |
|    | T18 Foreign body in alimentary tract                                                                                                                                                          | 239           | 93           | 2.6        | (2 , 3.3)          |                   | 0.45     |
|    | T17 Foreign body in respiratory tract                                                                                                                                                         | 187           | 111          | 1.7        | (1.3 , 2.1)        |                   | 0.42     |
|    | T16 Foreign body in ear                                                                                                                                                                       | 144           | 58           | 2.5        | (1.8 , 3.4)        |                   | 0.30     |
|    | H18 Other disorders of cornea                                                                                                                                                                 | 82            | 42           | 2.0        | (1.4 , 2.9)        |                   | 0.22     |
| 31 | <b>Emergency Medicine: Complications of Medical Procedures</b>                                                                                                                                | <b>2,600</b>  | <b>1,533</b> | <b>1.8</b> | <b>(1.6 , 1.9)</b> | <b>&lt;0.0001</b> | <b>-</b> |
|    | Y83 Surgical operation and other surgical procedures as the cause of abnormal reaction of the patient, or of later complication, without mention of misadventure at the time of the procedure | 2,149         | 1,276        | 1.7        | (1.6 , 1.9)        |                   | 0.70     |
|    | T81 Complications of procedures, not elsewhere classified                                                                                                                                     | 1,315         | 763          | 1.8        | (1.6 , 1.9)        |                   | 0.68     |
|    | Y84 Other medical procedures as the cause of abnormal reaction of the patient, or of later complication, without mention of misadventure at the time of the procedure                         | 600           | 296          | 2.1        | (1.8 , 2.4)        |                   | 0.34     |
|    | T82 Complications of cardiac and vascular prosthetic devices, implants and grafts                                                                                                             | 198           | 110          | 1.8        | (1.4 , 2.3)        |                   | 0.32     |

|    |                                                                                                               |              |              |            |                   |                   |      |
|----|---------------------------------------------------------------------------------------------------------------|--------------|--------------|------------|-------------------|-------------------|------|
| 32 | <b>Environmental Exposures: Exposure to Heat and Light</b>                                                    | <b>66</b>    | <b>26</b>    | <b>2.5</b> | <b>(1.6, 4)</b>   | <b>&lt;0.0001</b> | -    |
|    | X30 Exposure to excessive natural heat                                                                        | 54           | 18           | 3.0        | (1.8, 5.1)        |                   | 0.95 |
|    | T67 Effects of heat and light                                                                                 | 62           | 25           | 2.5        | (1.6, 3.9)        |                   | 0.95 |
| 33 | <b>Environmental Exposures: Exposure to Cold/Hypothermia</b>                                                  | <b>82</b>    | <b>21</b>    | <b>3.9</b> | <b>(2.4, 6.3)</b> | <b>&lt;0.0001</b> | -    |
|    | X31 Exposure to excessive natural cold                                                                        | 76           | 19           | 4.0        | (2.4, 6.6)        |                   | 0.93 |
|    | T35 Frostbite involving multiple body regions and unspecified frostbite                                       | 39           | 11           | 3.5        | (1.8, 6.9)        |                   | 0.77 |
|    | T68 Hypothermia                                                                                               | NR           | <6           | 4.0        | (1.5, 10.7)       |                   | 0.53 |
| 34 | <b>Environmental Exposures: Bee, Wasp and Hornet Stings</b>                                                   | <b>349</b>   | <b>174</b>   | <b>2.0</b> | <b>(1.7, 2.4)</b> | <b>&lt;0.0001</b> | -    |
|    | T63 Toxic effect of contact with venomous animals and plants                                                  | 267          | 139          | 1.9        | (1.6, 2.4)        |                   | 0.94 |
|    | X23 Contact with hornets, wasps and bees                                                                      | 314          | 156          | 2.0        | (1.7, 2.4)        |                   | 0.94 |
| 35 | <b>Infectious Diseases: Viral Conjunctivitis</b>                                                              | <b>84</b>    | <b>41</b>    | <b>2.0</b> | <b>(1.4, 3)</b>   | <b>0.0002</b>     | -    |
|    | B30 Viral conjunctivitis                                                                                      | 80           | 39           | 2.1        | (1.4, 3)          |                   | 0.94 |
|    | H13 Disorders of conjunctiva in diseases classified elsewhere                                                 | 54           | 24           | 2.3        | (1.4, 3.6)        |                   | 0.94 |
| 36 | <b>Trauma: Assault and Intentional Injury</b>                                                                 | <b>1,266</b> | <b>334</b>   | <b>3.9</b> | <b>(3.4, 4.4)</b> | <b>&lt;0.0001</b> | -    |
|    | X99 Assault by sharp object                                                                                   | 144          | 17           | 8.5        | (5.1, 14)         |                   | 0.57 |
|    | S21 Open wound of thorax                                                                                      | 71           | 17           | 4.2        | (2.5, 7.1)        |                   | 0.43 |
|    | S11 Open wound of neck                                                                                        | 30           | 10           | 3.0        | (1.5, 6.1)        |                   | 0.33 |
|    | S41 Open wound of shoulder and upper arm                                                                      | 111          | 35           | 3.2        | (2.2, 4.6)        |                   | 0.31 |
|    | T01 Open wounds involving multiple body regions                                                               | 37           | 9            | 4.1        | (2, 8.5)          |                   | 0.29 |
|    | S27 Injury of other and unspecified intrathoracic organs                                                      | NR           | <6           | 17.6       | (7.1, 43.3)       |                   | 0.27 |
|    | X78 Intentional self-harm by sharp object                                                                     | 167          | 39           | 4.3        | (3, 6.1)          |                   | 0.27 |
|    | S31 Open wound of abdomen, lower back, pelvis and external genitals                                           | 172          | 53           | 3.2        | (2.4, 4.4)        |                   | 0.26 |
|    | S51 Open wound of elbow and forearm                                                                           | 669          | 183          | 3.7        | (3.1, 4.3)        |                   | 0.23 |
| 37 | <b>Pharmacology Emergencies: Adverse Reactions to Antibiotics and Other Substances</b>                        | <b>3,851</b> | <b>1,870</b> | <b>2.2</b> | <b>(2, 2.3)</b>   | <b>&lt;0.0001</b> | -    |
|    | Y40 Systemic antibiotics                                                                                      | 316          | 154          | 2.1        | (1.7, 2.5)        |                   | 0.55 |
|    | L27 Dermatitis due to substances taken internally                                                             | 141          | 68           | 2.1        | (1.6, 2.8)        |                   | 0.49 |
|    | T88 Other complications of surgical and medical care, not elsewhere classified                                | 311          | 154          | 2.0        | (1.7, 2.5)        |                   | 0.42 |
|    | T78 Adverse effects, not elsewhere classified                                                                 | 936          | 395          | 2.4        | (2.1, 2.7)        |                   | 0.40 |
|    | Y57 Other and unspecified drugs and medicaments                                                               | 171          | 66           | 2.6        | (2, 3.5)          |                   | 0.31 |
|    | R21 Rash and other nonspecific skin eruption                                                                  | 1,307        | 810          | 1.6        | (1.5, 1.8)        |                   | 0.28 |
|    | L50 Urticaria                                                                                                 | 615          | 345          | 1.8        | (1.6, 2.1)        |                   | 0.27 |
|    | X58 Exposure to other specified factors                                                                       | 1,127        | 338          | 3.4        | (3, 3.8)          |                   | 0.24 |
| 38 | <b>Trauma: Adult &amp; Child Abuse and Sexual Assault</b>                                                     | <b>176</b>   | <b>34</b>    | <b>5.4</b> | <b>(3.7, 7.9)</b> | <b>&lt;0.0001</b> | -    |
|    | T74 Adult and child abuse, neglect and other maltreatment, confirmed                                          | 62           | 18           | 3.6        | (2.1, 6.1)        |                   | 0.79 |
|    | Y05 Sexual assault by bodily force                                                                            | 62           | 18           | 3.4        | (2, 5.8)          |                   | 0.63 |
|    | Y07 Perpetrator of assault, maltreatment and neglect                                                          | 118          | 13           | 9.8        | (5.4, 17.7)       |                   | 0.57 |
| 39 | <b>Environmental Exposures: Burn and Chemical Poisoning</b>                                                   | <b>436</b>   | <b>127</b>   | <b>3.5</b> | <b>(2.8, 4.2)</b> | <b>&lt;0.0001</b> | -    |
|    | T26 Burn and corrosion confined to eye and adnexa                                                             | 100          | 31           | 3.2        | (2.2, 4.8)        |                   | 0.77 |
|    | W89 Exposure to man-made visible and ultraviolet light                                                        | 33           | 16           | 2.1        | (1.1, 3.7)        |                   | 0.66 |
|    | X49 Accidental poisoning by and exposure to other and unspecified chemicals and noxious substances            | 279          | 83           | 3.4        | (2.7, 4.3)        |                   | 0.44 |
|    | X08 Exposure to other specified smoke, fire and flames                                                        | 60           | 11           | 5.5        | (2.9, 10.4)       |                   | 0.26 |
|    | T54 Toxic effect of corrosive substances                                                                      | NR           | <6           | 6.0        | (2.1, 17.3)       |                   | 0.21 |
|    | T65 Toxic effect of other and unspecified substances                                                          | 55           | 22           | 2.5        | (1.5, 4.1)        |                   | 0.21 |
| 40 | <b>Gynecology: Infections and Other</b>                                                                       | <b>571</b>   | <b>273</b>   | <b>2.1</b> | <b>(1.8, 2.4)</b> | <b>&lt;0.0001</b> | -    |
|    | N77 Vulvovaginal ulceration and inflammation in diseases classified elsewhere                                 | 134          | 56           | 2.4        | (1.8, 3.3)        |                   | 0.80 |
|    | B37 Candidiasis                                                                                               | 368          | 181          | 2.0        | (1.7, 2.4)        |                   | 0.66 |
|    | A60 Anogenital herpesviral [herpes simplex] infections                                                        | 55           | 15           | 3.7        | (2.1, 6.5)        |                   | 0.48 |
|    | N76 Other inflammation of vagina and vulva                                                                    | 178          | 86           | 2.1        | (1.6, 2.7)        |                   | 0.28 |
| 41 | <b>Pharmacology Emergencies: Poisoning due to Drugs Acting on Autonomic Nervous System</b>                    | <b>33</b>    | <b>13</b>    | <b>2.5</b> | <b>(1.3, 4.8)</b> | <b>0.0044</b>     | -    |
|    | X63 Intentional self-poisoning by and exposure to other drugs acting on the autonomic nervous system          | NR           | <6           | 2.7        | (0.7, 10.1)       |                   | 0.83 |
|    | T44 Poisoning by, adverse effect of and underdosing of drugs primarily affecting the autonomic nervous system | 33           | 13           | 2.5        | (1.3, 4.8)        |                   | 0.82 |
| 42 | <b>Environmental Exposures: Toxic Effect of Gases, Fumes and Vapours</b>                                      | <b>159</b>   | <b>46</b>    | <b>3.5</b> | <b>(2.5, 4.8)</b> | <b>&lt;0.0001</b> | -    |
|    | T59 Toxic effect of other gases, fumes and vapors                                                             | 93           | 28           | 3.3        | (2.2, 5.1)        |                   | 0.86 |
|    | X47 Accidental poisoning by and exposure to other gases and vapours                                           | 67           | 20           | 3.4        | (2, 5.5)          |                   | 0.82 |
|    | X09 Exposure to unspecified smoke, fire and flames                                                            | 59           | 18           | 3.3        | (1.9, 5.6)        |                   | 0.24 |
| 43 | <b>Environmental Exposures: Exposure to electrical Current</b>                                                | <b>64</b>    | <b>19</b>    | <b>3.4</b> | <b>(2, 5.6)</b>   | <b>&lt;0.0001</b> | -    |

|     |                                                        |    |    |     |            |      |
|-----|--------------------------------------------------------|----|----|-----|------------|------|
| W87 | Exposure to unspecified electric current               | 32 | 9  | 3.6 | (1.7, 7.4) | 0.87 |
| T75 | Other and unspecified effects of other external causes | 60 | 17 | 3.5 | (2.1, 6)   | 0.87 |

NR - Not reported due to small cell size

TBI - Traumatic Brain Injury

**Supplementary Table 2 - ICD-10 Codes not included in the Factors.** Provides all ICD-10 codes not included in any factor (in alphabetical order), including their descriptions, frequencies (in TBI and reference population), and odds ratio (and 95% confidence interval) from multiple testing results.

| ICD-10 Codes                                                       | Description                                                                                        | Frequency |                      | Odds Ratio | Confidence Interval |
|--------------------------------------------------------------------|----------------------------------------------------------------------------------------------------|-----------|----------------------|------------|---------------------|
|                                                                    |                                                                                                    | TBI       | Reference Population |            |                     |
| <b>I. Certain infectious and parasitic diseases (A00-B99)</b>      |                                                                                                    |           |                      |            |                     |
| A04                                                                | Other bacterial intestinal infections                                                              | 150       | 57                   | 2.6        | (1.9, 3.6)          |
| A08                                                                | Viral and other specified intestinal infections                                                    | 600       | 314                  | 2.0        | (1.7, 2.3)          |
| A09                                                                | Other gastroenteritis and colitis of infectious and unspecified origin                             | 2,028     | 633                  | 3.3        | (3, 3.6)            |
| A37                                                                | Whooping cough                                                                                     | 17        | 10                   | 1.7        | (0.8, 3.7)          |
| A38                                                                | Scarlet fever                                                                                      | 60        | 26                   | 2.3        | (1.5, 3.7)          |
| A46                                                                | Erysipelas                                                                                         | 19        | 8                    | 2.4        | (1, 5.4)            |
| A49                                                                | Bacterial infection of unspecified site                                                            | 96        | 39                   | 2.5        | (1.7, 3.6)          |
| A64                                                                | Unspecified sexually transmitted disease                                                           | 45        | 6                    | 7.5        | (3.2, 17.6)         |
| A74                                                                | Other diseases caused by chlamydiae                                                                | NR        | <6                   | 3.5        | (1.2, 10.6)         |
| B00                                                                | Herpesviral [herpes simplex] infections                                                            | 154       | 79                   | 2.0        | (1.5, 2.6)          |
| B01                                                                | Varicella [chickenpox]                                                                             | 119       | 89                   | 1.3        | (1, 1.8)            |
| B02                                                                | Zoster [herpes zoster]                                                                             | 315       | 181                  | 1.7        | (1.5, 2.1)          |
| B07                                                                | Viral warts                                                                                        | 147       | 88                   | 1.7        | (1.3, 2.2)          |
| B08                                                                | Other viral infections characterized by skin and mucous membrane lesions, not elsewhere classified | 131       | 51                   | 2.6        | (1.9, 3.5)          |
| B09                                                                | Unspecified viral infection characterized by skin and mucous membrane lesions                      | 161       | 71                   | 2.3        | (1.7, 3)            |
| B27                                                                | Infectious mononucleosis                                                                           | 265       | 112                  | 2.4        | (1.9, 3)            |
| B35                                                                | Dermatophytosis                                                                                    | 170       | 65                   | 2.6        | (2, 3.5)            |
| B80                                                                | Enterobiasis                                                                                       | 35        | 12                   | 2.9        | (1.5, 5.6)          |
| B86                                                                | Scabies                                                                                            | 57        | 22                   | 2.6        | (1.6, 4.2)          |
| B97                                                                | Viral agents as the cause of diseases classified elsewhere                                         | 199       | 84                   | 2.4        | (1.8, 3.1)          |
| <b>II. Neoplasms (C00-D48)</b>                                     |                                                                                                    |           |                      |            |                     |
| C90                                                                | Multiple myeloma and malignant plasma cell neoplasms                                               | 31        | 12                   | 2.6        | (1.3, 5)            |
| <b>IV. Endocrine, nutritional and metabolic diseases (E00-E90)</b> |                                                                                                    |           |                      |            |                     |
| E03                                                                | Other hypothyroidism                                                                               | 234       | 130                  | 1.8        | (1.5, 2.3)          |
| E16                                                                | Other disorders of pancreatic internal secretion                                                   | 95        | 39                   | 2.4        | (1.7, 3.5)          |
| E22                                                                | Hyperfunction of pituitary gland                                                                   | 25        | 15                   | 1.7        | (0.9, 3.2)          |
| E46                                                                | Unspecified protein-energy malnutrition                                                            | 41        | 16                   | 2.6        | (1.4, 4.6)          |
| <b>V. Mental and behavioural disorders (F00-F99)</b>               |                                                                                                    |           |                      |            |                     |
| F01                                                                | Vascular dementia                                                                                  | 49        | 17                   | 2.9        | (1.7, 5)            |
| F06                                                                | Other mental disorders due to known physiological condition                                        | 75        | 18                   | 4.2        | (2.5, 7)            |
| F07                                                                | Personality and behavioral disorders due to known physiological condition                          | NR        | <6                   | 56.7       | (18.1, 177.5)       |
| F15                                                                | Other stimulant related disorders                                                                  | 40        | 18                   | 2.2        | (1.3, 3.9)          |
| F45                                                                | Somatoform disorders                                                                               | 71        | 22                   | 3.2        | (2, 5.2)            |
| F48                                                                | Other nonpsychotic mental disorders                                                                | 26        | 13                   | 2.0        | (1, 3.9)            |
| F51                                                                | Sleep disorders not due to a substance or known physiological condition                            | 30        | 7                    | 4.3        | (1.9, 9.8)          |
| <b>VI. Diseases of the nervous system (G00-G99)</b>                |                                                                                                    |           |                      |            |                     |
| G03                                                                | Meningitis due to other and unspecified causes                                                     | 28        | 9                    | 3.1        | (1.5, 6.6)          |

|                                                                |                                                                         |     |     |     |             |
|----------------------------------------------------------------|-------------------------------------------------------------------------|-----|-----|-----|-------------|
| G06                                                            | Intracranial and intraspinal abscess and granuloma                      | 11  | 6   | 1.8 | (0.7, 5)    |
| G25                                                            | Other extrapyramidal and movement disorders                             | 56  | 22  | 2.5 | (1.6, 4.2)  |
| G31                                                            | Other degenerative diseases of nervous system, not elsewhere classified | 33  | 6   | 5.5 | (2.3, 13.1) |
| G35                                                            | Multiple sclerosis                                                      | 44  | 18  | 2.4 | (1.4, 4.2)  |
| G44                                                            | Other headache syndromes                                                | 272 | 78  | 3.5 | (2.7, 4.5)  |
| G47                                                            | Sleep disorders                                                         | 319 | 186 | 1.7 | (1.4, 2.1)  |
| G50                                                            | Disorders of trigeminal nerve                                           | 57  | 20  | 2.9 | (1.7, 4.7)  |
| G62                                                            | Other and unspecified polyneuropathies                                  | 80  | 23  | 3.5 | (2.2, 5.5)  |
| G91                                                            | Hydrocephalus                                                           | 58  | 19  | 3.1 | (1.8, 5.1)  |
| <b>VII. Diseases of the eye and adnexa (H00-H59)</b>           |                                                                         |     |     |     |             |
| H00                                                            | Hordeolum and chalazion                                                 | 201 | 126 | 1.6 | (1.3, 2)    |
| H05                                                            | Disorders of orbit                                                      | 70  | 37  | 1.9 | (1.3, 2.8)  |
| H11                                                            | Other disorders of conjunctiva                                          | 206 | 115 | 1.8 | (1.4, 2.3)  |
| H16                                                            | Keratitis                                                               | 156 | 70  | 2.2 | (1.7, 3)    |
| H20                                                            | Iridocyclitis                                                           | 46  | 22  | 2.1 | (1.3, 3.5)  |
| H53                                                            | Visual disturbances                                                     | 307 | 170 | 1.8 | (1.5, 2.2)  |
| H57                                                            | Other disorders of eye and adnexa                                       | 689 | 451 | 1.5 | (1.4, 1.7)  |
| <b>VIII. Diseases of the ear and mastoid process (H60-H95)</b> |                                                                         |     |     |     |             |
| H61                                                            | Other disorders of external ear                                         | 315 | 206 | 1.5 | (1.3, 1.8)  |
| H72                                                            | Perforation of tympanic membrane                                        | 123 | 64  | 2.0 | (1.4, 2.7)  |
| H81                                                            | Disorders of vestibular function                                        | 326 | 210 | 1.6 | (1.3, 1.9)  |
| H83                                                            | Other diseases of inner ear                                             | 154 | 83  | 1.9 | (1.4, 2.4)  |
| <b>IX. Diseases of the circulatory system (I00-I99)</b>        |                                                                         |     |     |     |             |
| I26                                                            | Pulmonary embolism                                                      | 249 | 108 | 2.3 | (1.9, 2.9)  |
| I27                                                            | Other pulmonary heart diseases                                          | 69  | 29  | 2.4 | (1.5, 3.7)  |
| I31                                                            | Other diseases of pericardium                                           | 71  | 48  | 1.5 | (1, 2.1)    |
| I47                                                            | Paroxysmal tachycardia                                                  | 259 | 147 | 1.8 | (1.4, 2.2)  |
| I49                                                            | Other cardiac arrhythmias                                               | 280 | 178 | 1.6 | (1.3, 1.9)  |
| I60                                                            | Nontraumatic subarachnoid hemorrhage                                    | 52  | 9   | 5.8 | (2.8, 11.7) |
| I87                                                            | Other disorders of veins                                                | 43  | 20  | 2.2 | (1.3, 3.7)  |
| I88                                                            | Nonspecific lymphadenitis                                               | 218 | 77  | 2.8 | (2.2, 3.7)  |
| I95                                                            | Hypotension                                                             | 447 | 205 | 2.2 | (1.9, 2.6)  |
| <b>X. Diseases of the respiratory system (J00-J99)</b>         |                                                                         |     |     |     |             |
| J01                                                            | Acute sinusitis                                                         | 509 | 252 | 2.0 | (1.7, 2.4)  |
| J04                                                            | Acute laryngitis and tracheitis                                         | 117 | 62  | 1.9 | (1.4, 2.6)  |
| J11                                                            | Influenza due to unidentified influenza virus                           | 731 | 236 | 3.1 | (2.7, 3.6)  |
| J21                                                            | Acute bronchiolitis                                                     | 182 | 128 | 1.4 | (1.1, 1.8)  |
| J22                                                            | Unspecified acute lower respiratory infection                           | 323 | 132 | 2.5 | (2, 3.1)    |
| J30                                                            | Vasomotor and allergic rhinitis                                         | 96  | 59  | 1.6 | (1.2, 2.3)  |
| J32                                                            | Chronic sinusitis                                                       | 574 | 288 | 2.0 | (1.7, 2.3)  |
| J36                                                            | Peritonsillar abscess                                                   | 115 | 60  | 1.9 | (1.4, 2.6)  |
| J39                                                            | Other diseases of upper respiratory tract                               | 45  | 42  | 1.1 | (0.7, 1.6)  |
| J81                                                            | Pulmonary edema                                                         | 79  | 53  | 1.5 | (1.1, 2.1)  |
| J93                                                            | Pneumothorax and air leak                                               | 75  | 28  | 2.7 | (1.7, 4.1)  |
| <b>XI. Diseases of the digestive system (K00-K93)</b>          |                                                                         |     |     |     |             |
| K04                                                            | Diseases of pulp and periapical tissues                                 | 617 | 258 | 2.4 | (2.1, 2.8)  |
| K06                                                            | Other disorders of gingiva and edentulous alveolar ridge                | 21  | 15  | 1.4 | (0.7, 2.7)  |
| K08                                                            | Other disorders of teeth and supporting structures                      | 530 | 233 | 2.3 | (2, 2.7)    |
| K10                                                            | Other diseases of jaws                                                  | 101 | 52  | 1.9 | (1.4, 2.7)  |
| K11                                                            | Diseases of salivary glands                                             | 84  | 49  | 1.7 | (1.2, 2.4)  |
| K12                                                            | Stomatitis and related lesions                                          | 181 | 102 | 1.8 | (1.4, 2.3)  |
| K13                                                            | Other diseases of lip and oral mucosa                                   | 118 | 64  | 1.8 | (1.4, 2.5)  |

|                                                                                     |                                                                           |       |     |     |            |
|-------------------------------------------------------------------------------------|---------------------------------------------------------------------------|-------|-----|-----|------------|
| K27                                                                                 | Peptic ulcer, site unspecified                                            | 140   | 60  | 2.3 | (1.7, 3.2) |
| K46                                                                                 | Unspecified abdominal hernia                                              | 68    | 24  | 2.8 | (1.8, 4.5) |
| K59                                                                                 | Other functional intestinal disorders                                     | 1,725 | 800 | 2.2 | (2, 2.4)   |
| K64                                                                                 | Hemorrhoids and perianal venous thrombosis                                | 175   | 62  | 2.9 | (2.1, 3.8) |
| K85                                                                                 | Acute pancreatitis                                                        | 245   | 122 | 2.0 | (1.6, 2.5) |
| K86                                                                                 | Other diseases of pancreas                                                | 69    | 25  | 2.8 | (1.7, 4.4) |
| <b>XII. Diseases of the skin and subcutaneous tissue (L00-L99)</b>                  |                                                                           |       |     |     |            |
| L01                                                                                 | Impetigo                                                                  | 314   | 134 | 2.4 | (1.9, 2.9) |
| L04                                                                                 | Acute lymphadenitis                                                       | 71    | 29  | 2.4 | (1.6, 3.8) |
| L23                                                                                 | Allergic contact dermatitis                                               | 316   | 189 | 1.7 | (1.4, 2)   |
| L25                                                                                 | Unspecified contact dermatitis                                            | 351   | 123 | 2.9 | (2.3, 3.5) |
| L29                                                                                 | Pruritus                                                                  | 116   | 70  | 1.7 | (1.2, 2.3) |
| L30                                                                                 | Other and unspecified dermatitis                                          | 365   | 211 | 1.7 | (1.5, 2.1) |
| L42                                                                                 | Pityriasis rosea                                                          | 31    | 18  | 1.7 | (1, 3.1)   |
| L55                                                                                 | Sunburn                                                                   | 72    | 38  | 1.9 | (1.3, 2.8) |
| L60                                                                                 | Nail disorders                                                            | 233   | 157 | 1.5 | (1.2, 1.8) |
| L72                                                                                 | Follicular cysts of skin and subcutaneous tissue                          | 256   | 192 | 1.3 | (1.1, 1.6) |
| L73                                                                                 | Other follicular disorders                                                | 149   | 68  | 2.2 | (1.7, 2.9) |
| L98                                                                                 | Other disorders of skin and subcutaneous tissue, not elsewhere classified | 259   | 116 | 2.2 | (1.8, 2.8) |
| <b>XIII. Diseases of the musculoskeletal system and connective tissue (M00-M99)</b> |                                                                           |       |     |     |            |
| M00                                                                                 | Pyogenic arthritis                                                        | 48    | 35  | 1.4 | (0.9, 2.1) |
| M06                                                                                 | Other rheumatoid arthritis                                                | 72    | 46  | 1.6 | (1.1, 2.3) |
| M10                                                                                 | Gout                                                                      | 312   | 186 | 1.7 | (1.4, 2)   |
| M13                                                                                 | Other arthritis                                                           | 250   | 143 | 1.7 | (1.4, 2.1) |
| M19                                                                                 | Other and unspecified osteoarthritis                                      | 231   | 144 | 1.6 | (1.3, 2)   |
| M43                                                                                 | Other deforming dorsopathies                                              | 216   | 107 | 2.0 | (1.6, 2.5) |
| M51                                                                                 | Thoracic, thoracolumbar, and lumbosacral intervertebral disc disorders    | 260   | 157 | 1.7 | (1.4, 2)   |
| M53                                                                                 | Other and unspecified dorsopathies, not elsewhere classified              | 40    | 20  | 2.0 | (1.2, 3.4) |
| M60                                                                                 | Myositis                                                                  | 38    | 20  | 1.9 | (1.1, 3.3) |
| M62                                                                                 | Other disorders of muscle                                                 | 775   | 268 | 2.9 | (2.5, 3.4) |
| M65                                                                                 | Synovitis and tenosynovitis                                               | 271   | 183 | 1.5 | (1.2, 1.8) |
| M70                                                                                 | Soft tissue disorders related to use, overuse and pressure                | 331   | 126 | 2.7 | (2.2, 3.3) |
| M71                                                                                 | Other bursopathies                                                        | 123   | 61  | 2.0 | (1.5, 2.7) |
| M72                                                                                 | Fibroblastic disorders                                                    | 161   | 78  | 2.1 | (1.6, 2.7) |
| M75                                                                                 | Shoulder lesions                                                          | 395   | 251 | 1.6 | (1.3, 1.9) |
| M76                                                                                 | Enthesopathies, lower limb, excluding foot                                | 95    | 30  | 3.2 | (2.1, 4.8) |
| M77                                                                                 | Other enthesopathies                                                      | 301   | 96  | 3.2 | (2.5, 4)   |
| M80                                                                                 | Osteoporosis with current pathological fracture                           | 34    | 7   | 4.9 | (2.2, 11)  |
| M84                                                                                 | Disorder of continuity of bone                                            | 72    | 50  | 1.4 | (1, 2.1)   |
| M92                                                                                 | Other juvenile osteochondrosis                                            | 49    | 17  | 2.9 | (1.7, 5)   |
| M94                                                                                 | Other disorders of cartilage                                              | 293   | 99  | 3.0 | (2.4, 3.7) |
| <b>XIV. Diseases of the genitourinary system (N00-N99)</b>                          |                                                                           |       |     |     |            |
| N45                                                                                 | Orchitis and epididymitis                                                 | 189   | 85  | 2.3 | (1.7, 2.9) |
| N48                                                                                 | Other disorders of penis                                                  | 192   | 103 | 1.9 | (1.5, 2.4) |
| N50                                                                                 | Other and unspecified disorders of male genital organs                    | 226   | 133 | 1.7 | (1.4, 2.1) |
| N61                                                                                 | Inflammatory disorders of breast                                          | 72    | 35  | 2.1 | (1.4, 3.2) |
| N64                                                                                 | Other disorders of breast                                                 | 72    | 36  | 2.0 | (1.3, 3)   |
| N71                                                                                 | Inflammatory disease of uterus, except cervix                             | 14    | 7   | 2.0 | (0.8, 5)   |



| <b>XVIII. Symptoms, signs and abnormal clinical and laboratory findings, not elsewhere classified (R00-R99)</b> |                                                                           |       |     |     |            |
|-----------------------------------------------------------------------------------------------------------------|---------------------------------------------------------------------------|-------|-----|-----|------------|
| R00                                                                                                             | Abnormalities of heart beat                                               | 994   | 567 | 1.8 | (1.6, 2)   |
| R03                                                                                                             | Abnormal blood-pressure reading, without diagnosis                        | 43    | 33  | 1.3 | (0.8, 2.1) |
| R04                                                                                                             | Hemorrhage from respiratory passages                                      | 710   | 304 | 2.4 | (2.1, 2.7) |
| R09                                                                                                             | Other symptoms and signs involving the circulatory and respiratory system | 191   | 73  | 2.6 | (2, 3.4)   |
| R13                                                                                                             | Aphagia and dysphagia                                                     | 322   | 203 | 1.6 | (1.3, 1.9) |
| R20                                                                                                             | Disturbances of skin sensation                                            | 606   | 299 | 2.0 | (1.8, 2.4) |
| R23                                                                                                             | Other skin changes                                                        | 151   | 84  | 1.8 | (1.4, 2.3) |
| R25                                                                                                             | Abnormal involuntary movements                                            | 434   | 165 | 2.7 | (2.2, 3.2) |
| R27                                                                                                             | Other lack of coordination                                                | 78    | 16  | 4.9 | (2.8, 8.3) |
| R30                                                                                                             | Pain associated with micturition                                          | 313   | 219 | 1.4 | (1.2, 1.7) |
| R32                                                                                                             | Unspecified urinary incontinence                                          | 77    | 74  | 1.0 | (0.8, 1.4) |
| R40                                                                                                             | Somnolence, stupor and coma                                               | 130   | 40  | 3.3 | (2.3, 4.6) |
| R42                                                                                                             | Dizziness and giddiness                                                   | 1,615 | 802 | 2.1 | (1.9, 2.3) |
| R51                                                                                                             | Headache                                                                  | 2,336 | 902 | 2.7 | (2.5, 2.9) |
| R52                                                                                                             | Pain, not elsewhere classified                                            | 709   | 173 | 4.2 | (3.5, 4.9) |
| R55                                                                                                             | Syncope and collapse                                                      | 1,728 | 682 | 2.6 | (2.4, 2.8) |
| R59                                                                                                             | Enlarged lymph nodes                                                      | 242   | 113 | 2.2 | (1.7, 2.7) |
| R60                                                                                                             | Edema, not elsewhere classified                                           | 376   | 153 | 2.5 | (2, 3)     |
| R63                                                                                                             | Symptoms and signs concerning food and fluid intake                       | 239   | 149 | 1.6 | (1.3, 2)   |
| R68                                                                                                             | Other general symptoms and signs                                          | 321   | 157 | 2.1 | (1.7, 2.5) |
| R74                                                                                                             | Abnormal serum enzyme levels                                              | 87    | 35  | 2.5 | (1.7, 3.7) |
| R79                                                                                                             | Other abnormal findings of blood chemistry                                | 101   | 63  | 1.6 | (1.2, 2.2) |
| <b>XIX. Injury, poisoning and certain other consequences of external causes (S00-T98)</b>                       |                                                                           |       |     |     |            |
| S16                                                                                                             | Injury of muscle, fascia and tendon at neck level                         | 77    | 17  | 4.5 | (2.7, 7.7) |
| S29                                                                                                             | Other and unspecified injuries of thorax                                  | 457   | 109 | 4.2 | (3.4, 5.2) |
| S36                                                                                                             | Injury of intra-abdominal organs                                          | 72    | 19  | 3.8 | (2.3, 6.3) |
| S37                                                                                                             | Injury of urinary and pelvic organs                                       | 46    | 18  | 2.6 | (1.5, 4.4) |
| S42                                                                                                             | Fracture of shoulder and upper arm                                        | 918   | 365 | 2.6 | (2.3, 2.9) |
| S43                                                                                                             | Dislocation and sprain of joints and ligaments of shoulder girdle         | 1,033 | 313 | 3.3 | (2.9, 3.8) |
| S46                                                                                                             | Injury of muscle, fascia and tendon at shoulder and upper arm level       | 329   | 93  | 3.6 | (2.8, 4.5) |
| S53                                                                                                             | Dislocation and sprain of joints and ligaments of elbow                   | 271   | 109 | 2.5 | (2, 3.1)   |
| S54                                                                                                             | Injury of nerves at forearm level                                         | 22    | 7   | 3.1 | (1.3, 7.4) |
| S56                                                                                                             | Injury of muscle, fascia and tendon at forearm level                      | 92    | 25  | 3.7 | (2.4, 5.7) |
| S66                                                                                                             | Injury of muscle, fascia and tendon at wrist and hand level               | 156   | 51  | 3.1 | (2.2, 4.2) |
| S67                                                                                                             | Crushing injury of wrist, hand and fingers                                | 216   | 73  | 3.0 | (2.3, 3.9) |
| S70                                                                                                             | Superficial injury of hip and thigh                                       | 552   | 147 | 3.8 | (3.1, 4.5) |
| S71                                                                                                             | Open wound of hip and thigh                                               | 178   | 69  | 2.6 | (2, 3.4)   |
| S73                                                                                                             | Dislocation and sprain of joint and ligaments of hip                      | 75    | 41  | 1.8 | (1.3, 2.7) |
| S76                                                                                                             | Injury of muscle, fascia and tendon at hip and thigh level                | 116   | 44  | 2.6 | (1.9, 3.7) |
| S79                                                                                                             | Other and unspecified injuries of hip and thigh                           | 245   | 75  | 3.3 | (2.5, 4.2) |
| S80                                                                                                             | Superficial injury of knee and lower leg                                  | 1,792 | 521 | 3.5 | (3.2, 3.9) |
| S81                                                                                                             | Open wound of knee and lower leg                                          | 824   | 302 | 2.8 | (2.4, 3.1) |
| S86                                                                                                             | Injury of muscle, fascia and tendon at lower leg level                    | 139   | 49  | 2.8 | (2, 3.9)   |
| S96                                                                                                             | Injury of muscle and tendon at ankle and foot level                       | 52    | 14  | 3.7 | (2.1, 6.7) |
| S97                                                                                                             | Crushing injury of ankle and foot                                         | 29    | 13  | 2.2 | (1.2, 4.3) |
| T03                                                                                                             | Dislocations, sprains and strains involving multiple body regions         | 49    | 21  | 2.3 | (1.4, 3.9) |

|                                                                 |                                                                                                |       |     |     |             |
|-----------------------------------------------------------------|------------------------------------------------------------------------------------------------|-------|-----|-----|-------------|
| T06                                                             | Other injuries involving multiple body regions, not elsewhere classified                       | 82    | 19  | 4.3 | (2.6, 7.1)  |
| T07                                                             | Unspecified multiple injuries                                                                  | 57    | 17  | 3.4 | (2, 5.8)    |
| T09                                                             | Other injuries of spine and trunk, level unspecified                                           | 411   | 106 | 3.9 | (3.2, 4.9)  |
| T11                                                             | Other injuries of upper limb, level unspecified                                                | 334   | 127 | 2.6 | (2.1, 3.2)  |
| T13                                                             | Other injuries of lower limb, level unspecified                                                | 303   | 113 | 2.7 | (2.2, 3.3)  |
| T19                                                             | Foreign body in genitourinary tract                                                            | 39    | 21  | 1.9 | (1.1, 3.2)  |
| T52                                                             | Toxic effect of organic solvents                                                               | 33    | 12  | 2.8 | (1.4, 5.3)  |
| T79                                                             | Certain early complications of trauma, not elsewhere classified                                | 101   | 25  | 4.0 | (2.6, 6.3)  |
| T80                                                             | Complications following infusion, transfusion and therapeutic injection                        | 55    | 30  | 1.8 | (1.2, 2.9)  |
| <b>XX. External causes of morbidity and mortality (V01-Y98)</b> |                                                                                                |       |     |     |             |
| V03                                                             | Pedestrian injured in collision with car, pick-up truck or van                                 | 216   | 57  | 3.8 | (2.8, 5.1)  |
| V09                                                             | Pedestrian injured in other and unspecified transport accidents                                | 24    | 8   | 3.0 | (1.3, 6.7)  |
| V13                                                             | Pedal cycle rider injured in collision with car, pick-up truck or van                          | 117   | 30  | 3.9 | (2.6, 5.8)  |
| V17                                                             | Pedal cycle rider injured in collision with fixed or stationary object                         | 35    | 6   | 5.8 | (2.5, 13.9) |
| V19                                                             | Pedal cycle rider injured in other and unspecified transport accidents                         | 145   | 52  | 2.8 | (2.1, 3.9)  |
| V23                                                             | Motorcycle rider injured in collision with car, pick-up truck or van                           | 21    | 7   | 3.0 | (1.3, 7.1)  |
| V28                                                             | Motorcycle rider injured in noncollision transport accident                                    | 174   | 48  | 3.7 | (2.7, 5.1)  |
| V29                                                             | Motorcycle rider injured in other and unspecified transport accidents                          | 58    | 18  | 3.2 | (1.9, 5.5)  |
| V44                                                             | Car occupant injured in collision with heavy transport vehicle or bus                          | 28    | 12  | 2.3 | (1.2, 4.6)  |
| V47                                                             | Car occupant injured in collision with fixed or stationary object                              | 146   | 33  | 4.4 | (3, 6.5)    |
| V48                                                             | Car occupant injured in noncollision transport accident                                        | 256   | 66  | 3.9 | (3, 5.1)    |
| V49                                                             | Car occupant injured in other and unspecified transport accidents                              | 175   | 50  | 3.5 | (2.6, 4.8)  |
| V53                                                             | Occupant of pick-up truck or van injured in collision with car, pick-up truck or van           | 43    | 6   | 7.2 | (3.1, 16.8) |
| V58                                                             | Occupant of pick-up truck or van injured in noncollision transport accident                    | 58    | 16  | 3.6 | (2.1, 6.3)  |
| V73                                                             | Bus occupant injured in collision with car, pick-up truck or van                               | NR    | <6  | 5.0 | (1.1, 22.8) |
| V78                                                             | Bus occupant injured in noncollision transport accident                                        | 53    | 16  | 3.3 | (1.9, 5.8)  |
| V80                                                             | Animal-rider or occupant of animal-drawn vehicle injured in transport accident                 | 181   | 32  | 5.7 | (3.9, 8.2)  |
| V86                                                             | Occupant of special all-terrain or other off-road motor vehicle, injured in transport accident | 418   | 124 | 3.4 | (2.8, 4.2)  |
| V94                                                             | Other and unspecified water transport accidents                                                | 38    | 6   | 6.3 | (2.7, 15)   |
| W00                                                             | Fall due to ice and snow                                                                       | 1,013 | 276 | 3.7 | (3.3, 4.3)  |
| W03                                                             | Other fall on same level due to collision with another person                                  | 135   | 24  | 5.8 | (3.7, 9.1)  |
| W04                                                             | Fall while being carried or supported by other persons                                         | 42    | 11  | 3.8 | (2, 7.4)    |
| W07                                                             | Fall from chair                                                                                | 267   | 60  | 4.5 | (3.4, 5.9)  |
| W08                                                             | Fall from other furniture                                                                      | 197   | 40  | 5.0 | (3.6, 7.1)  |
| W09                                                             | Fall on and from playground equipment                                                          | 525   | 164 | 3.2 | (2.7, 3.9)  |

|                                                                                          |                                                                                            |       |     |      |               |
|------------------------------------------------------------------------------------------|--------------------------------------------------------------------------------------------|-------|-----|------|---------------|
| W10                                                                                      | Fall on and from stairs and steps                                                          | 1,917 | 521 | 3.8  | (3.4, 4.1)    |
| W11                                                                                      | Fall on and from ladder                                                                    | 243   | 78  | 3.1  | (2.4, 4)      |
| W13                                                                                      | Fall from, out of or through building or structure                                         | 113   | 29  | 3.9  | (2.6, 5.9)    |
| W14                                                                                      | Fall from tree                                                                             | 67    | 26  | 2.6  | (1.6, 4.1)    |
| W16                                                                                      | Fall, jump or diving into water                                                            | 66    | 13  | 5.4  | (2.9, 10)     |
| W17                                                                                      | Other fall from one level to another                                                       | 758   | 210 | 3.7  | (3.1, 4.3)    |
| W20                                                                                      | Struck by thrown, projected or falling object                                              | 1,009 | 252 | 4.2  | (3.6, 4.8)    |
| W46                                                                                      | Contact with hypodermic needle                                                             | 69    | 28  | 2.5  | (1.6, 3.8)    |
| W50                                                                                      | Accidental hit, strike, kick, twist, bite or scratch by another person                     | 926   | 158 | 6.0  | (5.1, 7.1)    |
| W54                                                                                      | Contact with dog                                                                           | 503   | 138 | 3.7  | (3, 4.5)      |
| W55                                                                                      | Contact with other mammals                                                                 | 397   | 109 | 3.7  | (3, 4.5)      |
| W57                                                                                      | Bitten or stung by nonvenomous insect and other nonvenomous arthropods                     | 506   | 169 | 3.0  | (2.5, 3.6)    |
| W64                                                                                      | Exposure to other animate mechanical forces                                                | 22    | 7   | 3.1  | (1.3, 7.4)    |
| W79                                                                                      | Inhalation and ingestion of food causing obstruction of respiratory tract                  | 12    | 15  | 0.8  | (0.4, 1.7)    |
| X13                                                                                      | Contact with steam and other hot vapors                                                    | 14    | 7   | 2.0  | (0.8, 5)      |
| X83                                                                                      | Intentional self-harm by other specified means                                             | NR    | <6  | 2.2  | (0.8, 6.3)    |
| X84                                                                                      | Intentional self-harm by unspecified means                                                 | NR    | <6  | 3.8  | (1.4, 10.2)   |
| Y00                                                                                      | Assault by blunt object                                                                    | 132   | 6   | 22.0 | (9.7, 49.9)   |
| Y08                                                                                      | Assault by other specified means                                                           | 91    | 15  | 6.1  | (3.5, 10.5)   |
| Y28                                                                                      | Contact with sharp object, undetermined intent                                             | 81    | 22  | 3.7  | (2.3, 5.9)    |
| Y29                                                                                      | Contact with blunt object, undetermined intent                                             | 16    | 6   | 2.7  | (1, 6.8)      |
| Y34                                                                                      | Unspecified event, undetermined intent                                                     | 32    | 9   | 3.6  | (1.7, 7.4)    |
| Y35                                                                                      | Legal intervention                                                                         | 51    | 7   | 7.3  | (3.3, 16.1)   |
| Y42                                                                                      | Hormones and their synthetic substitutes and antagonists, not elsewhere classified         | 59    | 35  | 1.7  | (1.1, 2.6)    |
| Y45                                                                                      | Analgesics, antipyretics and anti-inflammatory drugs                                       | 230   | 94  | 2.5  | (1.9, 3.1)    |
| Y47                                                                                      | Sedatives, hypnotics and antianxiety drugs                                                 | NR    | <6  | 9.0  | (2.7, 29.7)   |
| Y49                                                                                      | Psychotropic drugs, not elsewhere classified                                               | 101   | 33  | 3.1  | (2.1, 4.5)    |
| Y51                                                                                      | Drugs primarily affecting the autonomic nervous system                                     | 54    | 37  | 1.5  | (1, 2.2)      |
| Y52                                                                                      | Agents primarily affecting the cardiovascular system                                       | 98    | 62  | 1.6  | (1.2, 2.2)    |
| Y54                                                                                      | Agents primarily affecting water-balance and mineral and uric acid metabolism              | 70    | 21  | 3.6  | (2.2, 6)      |
| Y85                                                                                      | Sequelae of transport accidents                                                            | 25    | 9   | 2.8  | (1.3, 6)      |
| Y86                                                                                      | Sequelae of other accidents                                                                | 58    | 19  | 3.1  | (1.8, 5.1)    |
| Y89                                                                                      | Sequelae of other external causes                                                          | 23    | 8   | 2.9  | (1.3, 6.4)    |
| Y91                                                                                      | Evidence of alcohol involvement determined by level of intoxication                        | NR    | <6  | 60.0 | (14.8, 242.7) |
| <b>XXI. Factors influencing health status and contact with health services (Z00-Z99)</b> |                                                                                            |       |     |      |               |
| Z00                                                                                      | Encounter for general examination without complaint, suspected or reported diagnosis       | 161   | 56  | 2.9  | (2.1, 4)      |
| Z01                                                                                      | Encounter for other special examination without complaint, suspected or reported diagnosis | 896   | 446 | 2.1  | (1.8, 2.3)    |
| Z02                                                                                      | Encounter for administrative examination                                                   | 361   | 106 | 3.5  | (2.8, 4.3)    |
| Z03                                                                                      | Encounter for medical observation for suspected diseases and conditions ruled out          | 585   | 464 | 1.3  | (1.1, 1.4)    |
| Z04                                                                                      | Encounter for examination and observation for other reasons                                | 987   | 342 | 2.9  | (2.6, 3.3)    |
| Z11                                                                                      | Encounter for screening for infectious and parasitic diseases                              | 153   | 52  | 2.9  | (2.1, 4)      |

|     |                                                                   |     |     |     |              |
|-----|-------------------------------------------------------------------|-----|-----|-----|--------------|
| Z20 | Contact with and (suspected) exposure to communicable diseases    | 100 | 37  | 2.7 | (1.9 , 3.9)  |
| Z23 | Need for immunization against single bacterial diseases           | 152 | 73  | 2.1 | (1.6 , 2.8)  |
| Z27 | Need for immunization against combinations of infectious diseases | 78  | 28  | 2.9 | (1.8 , 4.4)  |
| Z45 | Encounter for adjustment and management of implanted device       | 176 | 132 | 1.3 | (1.1 , 1.7)  |
| Z54 | Convalescence                                                     | 227 | 159 | 1.4 | (1.2 , 1.8)  |
| Z64 | Problems related to certain psychosocial circumstances            | NR  | <6  | 6.5 | (2.3 , 18.6) |
| Z86 | Personal history of certain other diseases                        | 727 | 491 | 1.5 | (1.3 , 1.7)  |
| Z96 | Presence of other functional implants                             | 183 | 121 | 1.5 | (1.2 , 1.9)  |
| Z97 | Presence of other devices                                         | 34  | 9   | 3.8 | (1.8 , 7.9)  |

NR - Not Reported due to small cell size

TBI - Traumatic Brain Injury

**Supplementary Table 3 - Scree Table.** Provides eigenvalues and their differences used in preparation of scree plots, as well as the proportion/cumulative proportion of total variance explained by each factor; used to make a decision on the number of factors to include in the final model.

| <b>Factor Number</b> | <b>Eigenvalue</b> | <b>Eigenvalue Difference</b> | <b>Proportion of Variance</b> | <b>Cumulative Proportion of Variance</b> |
|----------------------|-------------------|------------------------------|-------------------------------|------------------------------------------|
| 1                    | 9.951             | 3.218                        | 0.017                         | 0.017                                    |
| 2                    | 6.733             | 2.135                        | 0.012                         | 0.029                                    |
| 3                    | 4.598             | 1.622                        | 0.008                         | 0.037                                    |
| 4                    | 2.976             | 0.155                        | 0.005                         | 0.042                                    |
| 5                    | 2.822             | 0.048                        | 0.005                         | 0.047                                    |
| 6                    | 2.774             | 0.053                        | 0.005                         | 0.051                                    |
| 7                    | 2.721             | 0.160                        | 0.005                         | 0.056                                    |
| 8                    | 2.561             | 0.143                        | 0.004                         | 0.060                                    |
| 9                    | 2.418             | 0.123                        | 0.004                         | 0.065                                    |
| 10                   | 2.295             | 0.072                        | 0.004                         | 0.069                                    |
| 11                   | 2.223             | 0.119                        | 0.004                         | 0.072                                    |
| 12                   | 2.104             | 0.062                        | 0.004                         | 0.076                                    |
| 13                   | 2.041             | 0.028                        | 0.004                         | 0.079                                    |
| 14                   | 2.014             | 0.035                        | 0.004                         | 0.083                                    |
| 15                   | 1.979             | 0.048                        | 0.003                         | 0.086                                    |
| 16                   | 1.931             | 0.052                        | 0.003                         | 0.090                                    |
| 17                   | 1.879             | 0.036                        | 0.003                         | 0.093                                    |
| 18                   | 1.843             | 0.017                        | 0.003                         | 0.096                                    |
| 19                   | 1.826             | 0.002                        | 0.003                         | 0.099                                    |
| 20                   | 1.823             | 0.014                        | 0.003                         | 0.102                                    |
| 21                   | 1.809             | 0.019                        | 0.003                         | 0.105                                    |
| 22                   | 1.790             | 0.017                        | 0.003                         | 0.108                                    |
| 23                   | 1.773             | 0.016                        | 0.003                         | 0.112                                    |
| 24                   | 1.757             | 0.027                        | 0.003                         | 0.115                                    |
| 25                   | 1.730             | 0.011                        | 0.003                         | 0.118                                    |
| 26                   | 1.719             | 0.021                        | 0.003                         | 0.120                                    |
| 27                   | 1.698             | 0.054                        | 0.003                         | 0.123                                    |
| 28                   | 1.644             | 0.012                        | 0.003                         | 0.126                                    |
| 29                   | 1.632             | 0.008                        | 0.003                         | 0.129                                    |
| 30                   | 1.624             | 0.006                        | 0.003                         | 0.132                                    |
| 31                   | 1.618             | 0.037                        | 0.003                         | 0.135                                    |
| 32                   | 1.581             | 0.013                        | 0.003                         | 0.137                                    |
| 33                   | 1.569             | 0.007                        | 0.003                         | 0.140                                    |
| 34                   | 1.562             | 0.023                        | 0.003                         | 0.143                                    |
| 35                   | 1.539             | 0.005                        | 0.003                         | 0.145                                    |
| 36                   | 1.534             | 0.009                        | 0.003                         | 0.148                                    |
| 37                   | 1.525             | 0.015                        | 0.003                         | 0.151                                    |
| 38                   | 1.510             | 0.016                        | 0.003                         | 0.153                                    |
| 39                   | 1.494             | 0.018                        | 0.003                         | 0.156                                    |

|    |              |              |              |              |
|----|--------------|--------------|--------------|--------------|
| 40 | 1.476        | 0.011        | 0.003        | 0.158        |
| 41 | 1.464        | 0.008        | 0.003        | 0.161        |
| 42 | 1.456        | 0.011        | 0.003        | 0.163        |
| 43 | <b>1.445</b> | <b>0.018</b> | <b>0.003</b> | <b>0.166</b> |
| 44 | 1.427        | 0.015        | 0.003        | 0.168        |
| 45 | 1.412        | 0.017        | 0.002        | 0.171        |
| 46 | 1.395        | 0.007        | 0.002        | 0.173        |
| 47 | 1.388        | 0.006        | 0.002        | 0.175        |
| 48 | 1.382        | 0.020        | 0.002        | 0.178        |
| 49 | 1.363        | 0.004        | 0.002        | 0.180        |
| 50 | 1.359        | 0.014        | 0.002        | 0.183        |
